# Supplementary material for: Transcriptome and Proteome Data Reveal Candidate Genes for Pollinator Attraction in Sexually Deceptive Orchids
Source: PubMed Central journal article supplement (PMC3667177; doi:10.1371/journal.pone.0064621), 2013-05-29

**A**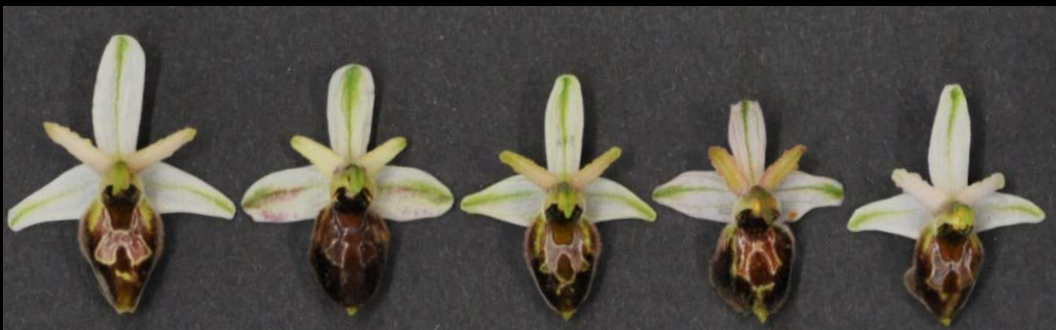**B**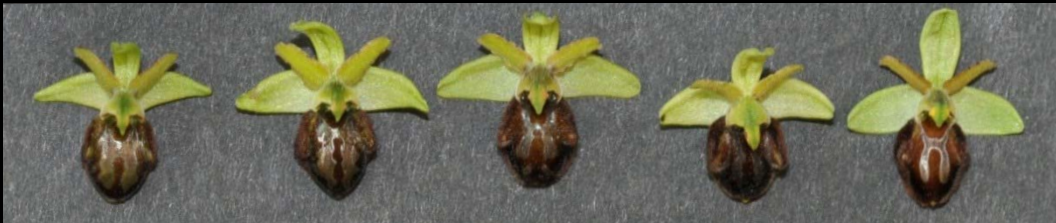

1 cm

**C**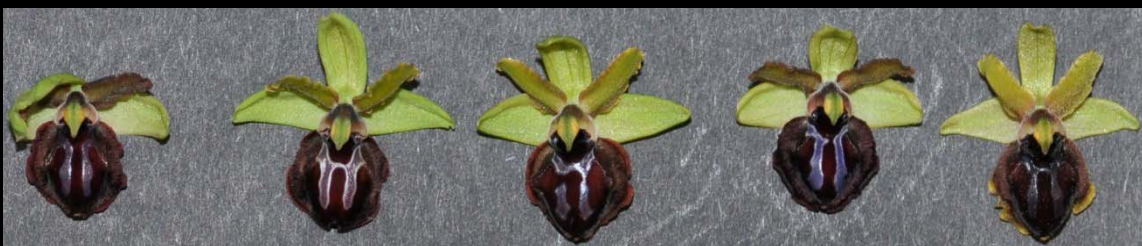

Supplement: pone.0064621.s001.pdf [file pone.0064621.s001.pdf]
