# Supplementary material for: Transcriptome and Proteome Data Reveal Candidate Genes for Pollinator Attraction in Sexually Deceptive Orchids
Source: PubMed Central journal article supplement (PMC3667177; doi:10.1371/journal.pone.0064621), 2013-05-29

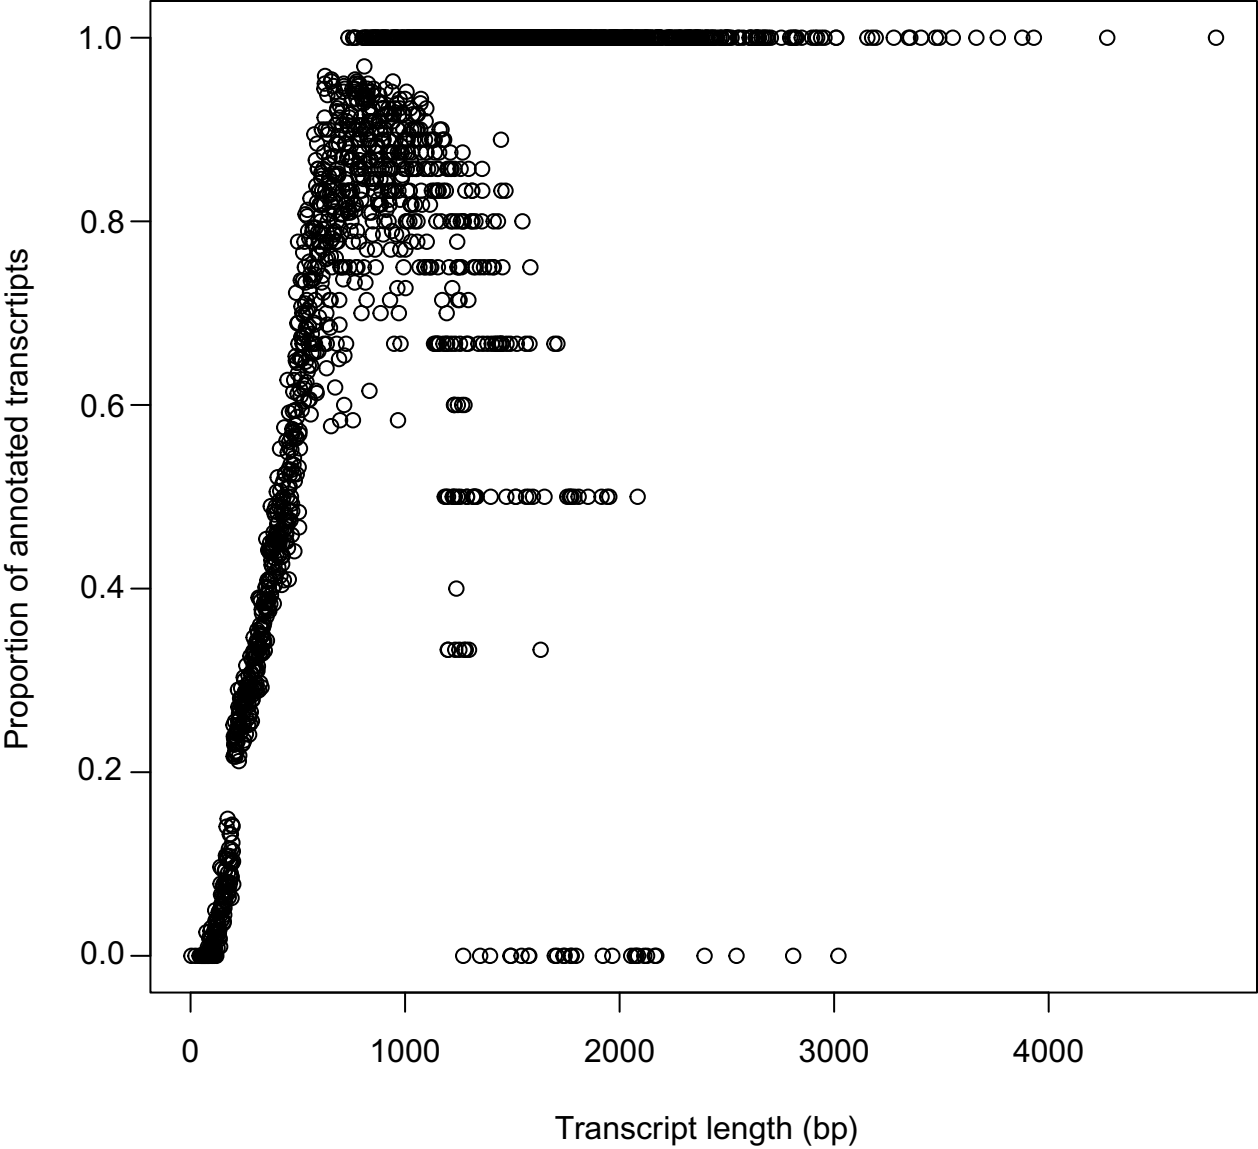

Supplement: pone.0064621.s002.pdf [file pone.0064621.s002.pdf]
