# Supplementary material for: Transcriptome and Proteome Data Reveal Candidate Genes for Pollinator Attraction in Sexually Deceptive Orchids
Source: PLoS One. 2013 May 29;8(5):e64621. doi: 10.1371/journal.pone.0064621 (PMC3667177; doi:10.1371/journal.pone.0064621)
Supplement: Table S7 — List of transcription factors. This table lists the identification method (TFDB, transcription factor database; KOG, KOG annotation) for TF identification, along with the unique transcript ID and annotation details (accession number or KOG term). The column ‘Transcription Factor’ lists the TF class identified from the database or the KOG description term, as appropriate. Species with transcripts or peptides for a given TF are listed, where: E, O. exaltata; G, O. garganica; S, O. sphegodes. Proteins identified in the HQ data set are marked with an asterisk. The Comments column provides further information on TFs of special interest. In addition to the TFs listed in this table, one additional transcript (transcript ID 3673) was found to have significant BLAST homology (e-value 6E–12) to a TF of interest, namely Antirrhinum majus AmMYBML1-like (AY661653.1). (XLSX) [file pone.0064621.s009.xlsx]

## Sheet: Table S7
Method	Transcript ID	Annotation details	Transcription factor	Species with transcripts	Species with peptides	Comments
TFDB	3135	Osj000771	AP2	E, G, S
TFDB	5274	Osj032245	AP2	E, G, S
TFDB	GZ44Y0R01B2M95	Osj012003	AP2	S
TFDB	GZ44Y0R01BKL8Y	Osj012003	AP2	S
TFDB	GZ44Y0R01BV0NB	Osj000771	AP2	E
TFDB	GZ44Y0R02ID764	Osj008281	AP2	E
TFDB	GZ44Y0R02JN2RU	Osj008281	AP2	S
TFDB	Singletons11621	Osj032329	AP2	S
TFDB	Singletons221054	Osj032329	AP2	S
TFDB	Singletons234392	Ath019978	AP2	S
TFDB	Singletons237350	Osj032245	AP2	S
TFDB	Singletons8795	Ath022136	AP2	S
TFDB	439	Osj023870	ARF	E, G, S
TFDB	1592	Osj044432	ARF	E, G, S
TFDB	2703	Osj029395	ARF	E, G
TFDB	2938	Osj020943	ARF	E, G, S
TFDB	3295	Ath009423	ARF	E, G, S
TFDB	3857	Osj041978	ARF	E, G, S
TFDB	GZ44Y0R01A2SD9	Osj026184	ARF	G
TFDB	GZ44Y0R01AM5B1	Ath005199	ARF	S
TFDB	GZ44Y0R01B5WQG	Osj020943	ARF	S
TFDB	GZ44Y0R01BX763	Osj047964	ARF	G
TFDB	GZ44Y0R01CKIC8	Ath000522	ARF	S
TFDB	GZ44Y0R01CN4WP	Osj041978	ARF	S
TFDB	GZ44Y0R01D8TQD	Osj055498	ARF	G
TFDB	GZ44Y0R01EJ2G6	Osj000200	ARF	S
TFDB	GZ44Y0R02FUS1J	Osj000200	ARF	S
TFDB	GZ44Y0R02FXTR4	Osj020943	ARF	G
TFDB	GZ44Y0R02GN32D	Osj016194	ARF	S
TFDB	GZ44Y0R02GYP2Q	Osj020693	ARF	G
TFDB	GZ44Y0R02HZDC1	Osj029395	ARF	S
TFDB	newbler-isotig00693	Osj036510	ARF	S
TFDB	newbler-isotig00695	Osj036510	ARF	G, S
TFDB	newbler-isotig01833	Osj023870	ARF	G, S
TFDB	newbler-isotig02439	Ath020733	ARF	E, G, S
TFDB	Singletons11610	Ath012481	ARF	S
TFDB	Singletons11999	Osj000200	ARF	S
TFDB	Singletons12973	Ath005199	ARF	S
TFDB	Singletons13441	Osj047964	ARF	S
TFDB	Singletons13840	Osj006312	ARF	S
TFDB	Singletons14896	Ath001624	ARF	G
TFDB	Singletons1499	Ath003302	ARF	S
TFDB	Singletons204677	Osj057686	ARF	S
TFDB	Singletons209325	Ath019215	ARF	S
TFDB	Singletons213040	Osj047748	ARF	S
TFDB	Singletons213448	Osj057686	ARF	S
TFDB	Singletons213693	Osj018632	ARF	S
TFDB	Singletons214814	Osj016194	ARF	S
TFDB	Singletons214932	Osj047964	ARF	S
TFDB	Singletons215513	Ath019618	ARF	S
TFDB	Singletons217975	Osj055498	ARF	S
TFDB	Singletons220465	Osj020943	ARF	S
TFDB	Singletons223376	Osj047964	ARF	G, S
TFDB	Singletons224403	Ath013112	ARF	G
TFDB	Singletons225347	Ath001624	ARF	S
TFDB	Singletons225902	Osj006312	ARF	S
TFDB	Singletons227903	Osj038737	ARF	S
TFDB	Singletons228041	Ath023130	ARF	S
TFDB	Singletons228732	Osj047964	ARF	S
TFDB	Singletons229304	Osj057686	ARF	S
TFDB	Singletons231536	Osj050168	ARF	G
TFDB	Singletons231580	Osj004934	ARF	S
TFDB	Singletons232049	Osj029395	ARF	S
TFDB	Singletons234062	Ath001624	ARF	S
TFDB	Singletons234685	Osj016194	ARF	S
TFDB	Singletons234835	Osj020693	ARF	G
TFDB	Singletons234861	Ath000522	ARF	S
TFDB	Singletons235513	Osj029395	ARF	S
TFDB	Singletons236535	Ath000522	ARF	S
TFDB	Singletons236896	Ath019724	ARF	S
TFDB	Singletons237579	Osj020943	ARF	E, S
TFDB	Singletons4253	Ath019724	ARF	G, S
TFDB	Singletons5838	Ath020733	ARF	S
TFDB	Singletons889	Ath019215	ARF	G, S
TFDB	Singletons9025	Osj026184	ARF	G, S
TFDB	Singletons9336	Osj047964	ARF	S
TFDB	1830	Osj007053	ARR-B	E, G, S
TFDB	1887	Ath028039	ARR-B	E, G, S
TFDB	GZ44Y0R01AZTEI	Ath025926	ARR-B	S
TFDB	GZ44Y0R01BPMFS	Ath004875	ARR-B	S
TFDB	GZ44Y0R02FVVKH	Ath004875	ARR-B	G
TFDB	GZ44Y0R02JKLI9	Ath028039	ARR-B	G
TFDB	Singletons11101	Osj006501	ARR-B	G
TFDB	Singletons14523	Ath030645	ARR-B	G
TFDB	Singletons219937	Ath028039	ARR-B	S
TFDB	Singletons220799	Ath004875	ARR-B	G, S
TFDB	Singletons228943	Osj007053	ARR-B	S
TFDB	Singletons236977	Osj034353	ARR-B	G, S
TFDB	Singletons237816	Osj032924	ARR-B	E, G
TFDB	Singletons4757	Osj034353	ARR-B	S
TFDB	Singletons5555	Osj007053	ARR-B	S
TFDB	4801	Osj025062	B3	E, G, S
TFDB	4991	Osj052246	B3	E, G, S
TFDB	GZ44Y0R01AS7JL	Osj053004	B3	S
TFDB	GZ44Y0R01C8YV6	Osj037320	B3	E
TFDB	GZ44Y0R02G18OS	Osj031905	B3	E
TFDB	GZ44Y0R02G4LJD	Osj032461	B3	S
TFDB	GZ44Y0R02H2ZS0	Osj000576	B3	E
TFDB	GZ44Y0R02JP8OD	Osj021903	B3	G
TFDB	Singletons10824	Osj031905	B3	S
TFDB	Singletons11834	Osj011659	B3	S
TFDB	Singletons13268	Osj025062	B3	S
TFDB	Singletons13802	Osj019619	B3	G, S
TFDB	Singletons14900	Osj051013	B3	S
TFDB	Singletons202421	Osj043782	B3	S
TFDB	Singletons203697	Osj029833	B3	S
TFDB	Singletons206619	Osj043823	B3	S
TFDB	Singletons211363	Osj037320	B3	S
TFDB	Singletons215476	Osj051013	B3	S
TFDB	Singletons217342	Osj021903	B3	G, S
TFDB	Singletons220787	Osj037320	B3	E
TFDB	Singletons222991	Osj035897	B3	S
TFDB	Singletons227521	Osj053004	B3	E
TFDB	Singletons229623	Osj031905	B3	S
TFDB	Singletons231118	Osj031905	B3	E
TFDB	Singletons235541	Osj051013	B3	S
TFDB	Singletons236824	Osj031905	B3	S
TFDB	Singletons237791	Osj020011	B3	G, S
TFDB	Singletons2553	Osj037320	B3	S
TFDB	Singletons7412	Osj047950	B3	E
TFDB	3511	Osj030828	BBR/BPC	E, G, S
TFDB	5096	Osj030828	BBR/BPC	E, G, S
TFDB	GZ44Y0R01A2NQP	Osj034470	BBR/BPC	G
TFDB	GZ44Y0R01DHMLC	Osj030828	BBR/BPC	S
TFDB	GZ44Y0R02F15UT	Ath006784	BBR/BPC	E
TFDB	GZ44Y0R02H308E	Osj030828	BBR/BPC	S
TFDB	GZ44Y0R02HIWCD	Ath006784	BBR/BPC	G
TFDB	GZ44Y0R02HQO9Y	Osj030828	BBR/BPC	E
TFDB	Singletons219444	Osj030828	BBR/BPC	S
TFDB	Singletons228568	Osj034470	BBR/BPC	E, G
TFDB	Singletons232748	Osj030828	BBR/BPC	E, G, S
TFDB	Singletons5511	Osj034470	BBR/BPC	G
TFDB	709	Ath031563	BES1	E, G, S	E, G, S*
TFDB	1051	Ath031563	BES1	E, G, S
TFDB	3856	Osj006655	BES1	E, G, S
TFDB	4933	Ath007583	BES1	E, G, S
TFDB	5215	Ath031563	BES1	E, G, S
TFDB	GZ44Y0R01A9UCA	Ath027780	BES1	S
TFDB	GZ44Y0R01ANAT0	Ath007583	BES1	G
TFDB	GZ44Y0R01EH2ZX	Ath027780	BES1	E
TFDB	GZ44Y0R02GENYX	Ath027780	BES1	S
TFDB	GZ44Y0R02GHIHT	Osj048084	BES1	S
TFDB	GZ44Y0R02H0O03	Ath031563	BES1	G
TFDB	GZ44Y0R02IM9WP	Osj006655	BES1	S
TFDB	GZ44Y0R02IXU8O	Ath031563	BES1	E
TFDB	newbler-isotig08905	Ath009093	BES1	E, G, S
TFDB	Singletons10363	Ath031563	BES1	S
TFDB	Singletons11823	Ath031563	BES1	S
TFDB	Singletons201383	Osj051701	BES1	S
TFDB	Singletons204566	Ath021188	BES1	S
TFDB	Singletons225769	Ath007583	BES1	G, S
TFDB	Singletons229261	Osj051701	BES1	S
TFDB	Singletons231229	Ath031563	BES1	S
TFDB	Singletons232252	Osj051701	BES1	S
TFDB	Singletons233341	Ath031563	BES1	E
TFDB	Singletons235953	Ath031563	BES1	S
TFDB	Singletons236394	Ath031563	BES1	G
TFDB	Singletons2909	Ath031563	BES1	G
TFDB	Singletons8772	Osj006655	BES1	S
TFDB	730	Osj042189	bHLH	E, G, S
TFDB	1691	Osj013973	bHLH	G, S
TFDB	1776	Osj025372	bHLH	E, G, S
TFDB	2157	Ath018135	bHLH	E, G, S
TFDB	2300	Osj010674	bHLH	E, G, S
TFDB	3171	Osj017206	bHLH	E, G, S
TFDB	3318	Ath021605	bHLH	E, G, S
TFDB	3582	Osj028081	bHLH	E, G, S
TFDB	4037	Osj049482	bHLH	G, S
TFDB	5205	Osj015726	bHLH	E, G, S
TFDB	5407	Ath002464	bHLH	E, G, S
TFDB	GZ44Y0R01AGCS0	Osj010674	bHLH	S
TFDB	GZ44Y0R01AQEOX	Osj002055	bHLH	S
TFDB	GZ44Y0R01AZ7D5	Osj030777	bHLH	G
TFDB	GZ44Y0R01B4DBX	Osj024284	bHLH	S
TFDB	GZ44Y0R01BDLBZ	Ath029788	bHLH	G
TFDB	GZ44Y0R01BU9ZB	Osj016883	bHLH	E
TFDB	GZ44Y0R01C696Y	Osj050834	bHLH	S
TFDB	GZ44Y0R01CBNVC	Osj020585	bHLH	S
TFDB	GZ44Y0R01CHLYX	Osj057274	bHLH	G
TFDB	GZ44Y0R01CNLPR	Ath027899	bHLH	S
TFDB	GZ44Y0R01DNV6N	Osj028081	bHLH	S
TFDB	GZ44Y0R01DOBZC	Osj030777	bHLH	G
TFDB	GZ44Y0R01DZBHO	Osj010799	bHLH	E
TFDB	GZ44Y0R01ED2JJ	Ath002183	bHLH	S
TFDB	GZ44Y0R01EJ3UY	Osj010799	bHLH	S
TFDB	GZ44Y0R01EL0GN	Osj010674	bHLH	G
TFDB	GZ44Y0R01EO5ZC	Osj006764	bHLH	G
TFDB	GZ44Y0R02F0KPU	Osj006764	bHLH	G
TFDB	GZ44Y0R02FTCXR	Osj040046	bHLH	S
TFDB	GZ44Y0R02FUMMB	Ath001131	bHLH	S	E
TFDB	GZ44Y0R02FY088	Osj030928	bHLH	S
TFDB	GZ44Y0R02GES6N	Osj042165	bHLH	S
TFDB	GZ44Y0R02GO1MM	Ath006191	bHLH	S
TFDB	GZ44Y0R02GOV1A	Osj049919	bHLH	G
TFDB	GZ44Y0R02GTA6K	Osj025904	bHLH	G
TFDB	GZ44Y0R02GWPLI	Ath015845	bHLH	G
TFDB	GZ44Y0R02GX3KS	Ath003087	bHLH	S
TFDB	GZ44Y0R02H0FDM	Osj015726	bHLH	G
TFDB	GZ44Y0R02HKUAC	Osj016883	bHLH	G
TFDB	GZ44Y0R02HMQFU	Osj006764	bHLH	G
TFDB	GZ44Y0R02IAZUA	Osj016883	bHLH	E
TFDB	GZ44Y0R02IG2XN	Ath013465	bHLH	E
TFDB	GZ44Y0R02IQWXL	Osj011141	bHLH	E
TFDB	GZ44Y0R02IRH5H	Osj030928	bHLH	E
TFDB	GZ44Y0R02JF3G2	Osj029627	bHLH	G
TFDB	GZ44Y0R02JVBGD	Ath006191	bHLH	S
TFDB	newbler-isotig04058	Osj040463	bHLH	E, G, S
TFDB	newbler-isotig06385	Osj009218	bHLH	G, S
TFDB	newbler-isotig06463	Osj005146	bHLH	E, G, S
TFDB	newbler-isotig06810	Osj015726	bHLH	E, G, S
TFDB	newbler-isotig08336	Osj053169	bHLH	E, G, S
TFDB	Singletons1193	Osj048240	bHLH	S
TFDB	Singletons12005	Ath019995	bHLH	G, S
TFDB	Singletons12919	Osj006764	bHLH	E, G, S
TFDB	Singletons14778	Osj011141	bHLH	E, G, S
TFDB	Singletons15103	Osj017641	bHLH	S
TFDB	Singletons207175	Osj050314	bHLH	S
TFDB	Singletons210900	Osj007379	bHLH	S
TFDB	Singletons210996	Ath003177	bHLH	E, G
TFDB	Singletons210998	Ath002464	bHLH	S
TFDB	Singletons213092	Osj024284	bHLH	S
TFDB	Singletons213799	Osj030777	bHLH	E, G
TFDB	Singletons215120	Ath003087	bHLH	S
TFDB	Singletons218463	Osj028081	bHLH	S
TFDB	Singletons219083	Ath004877	bHLH	S
TFDB	Singletons221174	Osj001876	bHLH	S
TFDB	Singletons221884	Osj015726	bHLH	S
TFDB	Singletons222121	Osj013864	bHLH	S
TFDB	Singletons222472	Osj024284	bHLH	S
TFDB	Singletons225170	Ath029385	bHLH	S
TFDB	Singletons226646	Osj056239	bHLH	S
TFDB	Singletons226748	Osj029673	bHLH	S
TFDB	Singletons227189	Osj030928	bHLH	E, S
TFDB	Singletons227902	Ath007943	bHLH	S
TFDB	Singletons228090	Ath003706	bHLH	S
TFDB	Singletons228267	Osj016883	bHLH	E, G
TFDB	Singletons228400	Osj053835	bHLH	S
TFDB	Singletons228466	Osj038655	bHLH	S
TFDB	Singletons228719	Osj040463	bHLH	S
TFDB	Singletons229262	Osj025904	bHLH	G
TFDB	Singletons229661	Osj050314	bHLH	S
TFDB	Singletons229762	Ath022019	bHLH	G, S
TFDB	Singletons231764	Osj036431	bHLH	S
TFDB	Singletons232693	Ath013465	bHLH	E
TFDB	Singletons232817	Osj046769	bHLH	S
TFDB	Singletons234126	Osj030631	bHLH	E, S
TFDB	Singletons234734	Ath002183	bHLH	S
TFDB	Singletons234754	Osj020585	bHLH	G, S
TFDB	Singletons235886	Ath014531	bHLH	E
TFDB	Singletons236101	Osj013864	bHLH	G, S
TFDB	Singletons236666	Ath019995	bHLH	S
TFDB	Singletons237246	Osj026934	bHLH	S
TFDB	Singletons237654	Osj053504	bHLH	E, G, S
TFDB	Singletons238029	Ath002008	bHLH	E
TFDB	Singletons238035	Ath019995	bHLH	S
TFDB	Singletons238129	Ath019995	bHLH	G
TFDB	Singletons2573	Osj023992	bHLH	G
TFDB	Singletons269	Osj054789	bHLH	S
TFDB	Singletons3430	Osj051027	bHLH	G, S
TFDB	Singletons4882	Ath002464	bHLH	S
TFDB	Singletons6879	Osj024284	bHLH	G, S
TFDB	Singletons7095	Osj007379	bHLH	S
TFDB	Singletons7398	Osj001876	bHLH	S
TFDB	Singletons7470	Osj048240	bHLH	S
TFDB	Singletons7827	Osj039572	bHLH	S
TFDB	Singletons7883	Osj044872	bHLH	G
TFDB	Singletons9131	Osj016443	bHLH	G
TFDB	Singletons9193	Osj010674	bHLH	G
TFDB	Singletons9603	Osj013973	bHLH	S
TFDB	Singletons9677	Osj010674	bHLH	S
TFDB	818	Ath025686	bZIP	E, G, S
TFDB	1021	Ath017711	bZIP	E, G, S
TFDB	1284	Osj042884	bZIP	E, G, S
TFDB	1323	Osj027369	bZIP	E, G, S
TFDB	1468	Osj026615	bZIP	E, G, S
TFDB	2270	Osj050853	bZIP	E, G, S
TFDB	3398	Osj011512	bZIP	E, G, S
TFDB	3501	Osj007461	bZIP	E, G, S
TFDB	3541	Osj055688	bZIP	E, G, S
TFDB	4038	Osj002935	bZIP	E, S
TFDB	4204	Osj026886	bZIP	E, G, S
TFDB	4383	Osj043167	bZIP	E, G, S
TFDB	5026	Ath025686	bZIP	E, G, S
TFDB	5140	Osj002383	bZIP	E, G, S
TFDB	5332	Osj004387	bZIP	E, G, S
TFDB	GZ44Y0R01A4I5C	Osj032659	bZIP	G
TFDB	GZ44Y0R01A5EAC	Osj032659	bZIP	G
TFDB	GZ44Y0R01A7LYP	Osj055688	bZIP	E
TFDB	GZ44Y0R01AGULY	Osj018232	bZIP	E
TFDB	GZ44Y0R01ARZL5	Osj032659	bZIP	E
TFDB	GZ44Y0R01B1ASU	Ath009277	bZIP	G
TFDB	GZ44Y0R01B89NT	Osj009701	bZIP	E
TFDB	GZ44Y0R01BEKKS	Osj032659	bZIP	E
TFDB	GZ44Y0R01BG9OE	Ath030511	bZIP	S
TFDB	GZ44Y0R01BMM54	Osj032659	bZIP	S
TFDB	GZ44Y0R01BPZCZ	Osj043966	bZIP	G
TFDB	GZ44Y0R01BWGXS	Osj009701	bZIP	E
TFDB	GZ44Y0R01BYHD5	Osj032659	bZIP	S
TFDB	GZ44Y0R01BZU97	Osj009701	bZIP	E
TFDB	GZ44Y0R01C44OG	Osj018511	bZIP	S
TFDB	GZ44Y0R01C58HC	Ath025686	bZIP	E
TFDB	GZ44Y0R01CM4NB	Ath022765	bZIP	S
TFDB	GZ44Y0R01CN5TI	Osj031340	bZIP	G
TFDB	GZ44Y0R01CUKU1	Osj002935	bZIP	G
TFDB	GZ44Y0R01CW2EQ	Osj001918	bZIP	S
TFDB	GZ44Y0R01CZDCV	Osj013226	bZIP	G
TFDB	GZ44Y0R01DHWID	Osj001918	bZIP	G
TFDB	GZ44Y0R01DVBQA	Osj055688	bZIP	G
TFDB	GZ44Y0R01EB625	Osj055688	bZIP	G
TFDB	GZ44Y0R01ECPQ6	Ath011037	bZIP	G
TFDB	GZ44Y0R01EKKIA	Osj002935	bZIP	G
TFDB	GZ44Y0R01EL81Z	Osj032659	bZIP	S
TFDB	GZ44Y0R01ERHQH	Osj002935	bZIP	G
TFDB	GZ44Y0R01EYU1Z	Osj042764	bZIP	S
TFDB	GZ44Y0R02F043T	Osj020481	bZIP	E
TFDB	GZ44Y0R02FLCKF	Osj032659	bZIP	S
TFDB	GZ44Y0R02GCE8I	Osj032659	bZIP	E
TFDB	GZ44Y0R02GJZ8L	Osj001918	bZIP	G
TFDB	GZ44Y0R02GOP1K	Osj026785	bZIP	G
TFDB	GZ44Y0R02GXLYN	Ath029666	bZIP	S
TFDB	GZ44Y0R02GZLLR	Osj018232	bZIP	S
TFDB	GZ44Y0R02HGDFH	Osj031340	bZIP	G
TFDB	GZ44Y0R02HTGKU	Osj009662	bZIP	S
TFDB	GZ44Y0R02I0P7K	Osj032659	bZIP	G
TFDB	GZ44Y0R02IGVLL	Osj044841	bZIP	E
TFDB	GZ44Y0R02IQG5T	Osj018232	bZIP	E
TFDB	GZ44Y0R02IYA7Y	Osj032659	bZIP	E
TFDB	GZ44Y0R02JEFGW	Osj047013	bZIP	E
TFDB	newbler-isotig07527	Osj002728	bZIP	G, S
TFDB	Singletons10776	Osj047805	bZIP	S
TFDB	Singletons11111	Osj001918	bZIP	E, G, S
TFDB	Singletons11523	Ath014652	bZIP	S
TFDB	Singletons11918	Osj044841	bZIP	E
TFDB	Singletons12930	Osj032659	bZIP	S
TFDB	Singletons12959	Osj032659	bZIP	S
TFDB	Singletons12969	Osj032659	bZIP	S
TFDB	Singletons14538	Osj032659	bZIP	S
TFDB	Singletons15422	Osj002693	bZIP	G, S
TFDB	Singletons208022	Osj032659	bZIP	S
TFDB	Singletons209829	Osj032659	bZIP	S
TFDB	Singletons211486	Osj004312	bZIP	S
TFDB	Singletons211682	Osj032659	bZIP	S
TFDB	Singletons213008	Ath006716	bZIP	S
TFDB	Singletons214775	Osj032659	bZIP	S
TFDB	Singletons216305	Osj002383	bZIP	S
TFDB	Singletons216837	Osj032659	bZIP	S
TFDB	Singletons219592	Osj032659	bZIP	S
TFDB	Singletons219682	Osj018511	bZIP	S
TFDB	Singletons220949	Ath029666	bZIP	S
TFDB	Singletons222600	Osj026785	bZIP	S
TFDB	Singletons222986	Osj047013	bZIP	E
TFDB	Singletons222999	Ath009277	bZIP	S
TFDB	Singletons223639	Osj018306	bZIP	E
TFDB	Singletons225356	Osj055688	bZIP	G, S
TFDB	Singletons225380	Osj032659	bZIP	S
TFDB	Singletons226557	Osj032659	bZIP	S
TFDB	Singletons228247	Osj018232	bZIP	E, S
TFDB	Singletons229965	Osj032659	bZIP	S
TFDB	Singletons231204	Osj032659	bZIP	S
TFDB	Singletons231740	Osj050910	bZIP	G, S
TFDB	Singletons231939	Osj042884	bZIP	G, S
TFDB	Singletons231949	Osj032659	bZIP	S
TFDB	Singletons231987	Ath024206	bZIP	S
TFDB	Singletons232744	Osj055688	bZIP	E, G
TFDB	Singletons232770	Osj032659	bZIP	S
TFDB	Singletons232935	Osj009701	bZIP	G
TFDB	Singletons233131	Osj026785	bZIP	G
TFDB	Singletons233282	Osj032659	bZIP	S
TFDB	Singletons233536	Ath030511	bZIP	S
TFDB	Singletons233640	Osj032659	bZIP	S
TFDB	Singletons233906	Ath021429	bZIP	S
TFDB	Singletons233995	Osj043008	bZIP	E, G
TFDB	Singletons235645	Osj032659	bZIP	S
TFDB	Singletons236553	Ath006716	bZIP	G, S
TFDB	Singletons236567	Ath014652	bZIP	G
TFDB	Singletons236776	Osj032659	bZIP	S
TFDB	Singletons236848	Osj032659	bZIP	S
TFDB	Singletons5358	Osj032659	bZIP	S
TFDB	Singletons6240	Osj032659	bZIP	S
TFDB	Singletons6974	Osj032659	bZIP	S
TFDB	Singletons9380	Osj019643	bZIP	S
TFDB	Singletons9875	Ath021429	bZIP	S
TFDB	835	Osj037828	C2H2	E, G, S
TFDB	2118	Osj046989	C2H2	E, G, S	E, G*
TFDB	2433	Ath019267	C2H2	E, G, S
TFDB	3282	Osj000236	C2H2	E, G, S
TFDB	3476	Ath012133	C2H2	E, G, S
TFDB	4811	Osj046989	C2H2	G, S
TFDB	5264	Osj008832	C2H2	E, G, S
TFDB	GZ44Y0R01A5GCS	Ath023002	C2H2	E
TFDB	GZ44Y0R01AE510	Ath028383	C2H2	G
TFDB	GZ44Y0R01AOFK0	Ath002193	C2H2	S
TFDB	GZ44Y0R01B2PKG	Ath030103	C2H2	S
TFDB	GZ44Y0R01BJV9Y	Ath009582	C2H2	G
TFDB	GZ44Y0R01BK5IE	Osj000236	C2H2	S
TFDB	GZ44Y0R01BNELF	Osj000236	C2H2	S
TFDB	GZ44Y0R01BWDHQ	Ath012259	C2H2	G
TFDB	GZ44Y0R01C39BR	Osj005546	C2H2	S
TFDB	GZ44Y0R01C8E21	Osj046989	C2H2	G
TFDB	GZ44Y0R01CCR9Q	Osj003447	C2H2	S
TFDB	GZ44Y0R01CFJ81	Ath015500	C2H2	E
TFDB	GZ44Y0R01CFNGT	Osj005546	C2H2	S
TFDB	GZ44Y0R01CHP50	Osj050406	C2H2	E
TFDB	GZ44Y0R01CVCYK	Osj000236	C2H2	S
TFDB	GZ44Y0R01D32HD	Osj005546	C2H2	G
TFDB	GZ44Y0R01DPPAG	Osj051202	C2H2	E
TFDB	GZ44Y0R01DRIE5	Osj025467	C2H2	E
TFDB	GZ44Y0R01DVPAK	Ath012133	C2H2	G
TFDB	GZ44Y0R01EVCET	Osj000236	C2H2	S
TFDB	GZ44Y0R02FK308	Ath012706	C2H2	S
TFDB	GZ44Y0R02FN55H	Ath023002	C2H2	E
TFDB	GZ44Y0R02FRW0Z	Osj017021	C2H2	G
TFDB	GZ44Y0R02G8DAG	Osj000236	C2H2	S
TFDB	GZ44Y0R02GLTV7	Ath023002	C2H2	G
TFDB	GZ44Y0R02GMBWS	Ath031683	C2H2	G
TFDB	GZ44Y0R02GY9A3	Ath002193	C2H2	S
TFDB	GZ44Y0R02H0L9Z	Osj053859	C2H2	S
TFDB	GZ44Y0R02H4A78	Ath029140	C2H2	E
TFDB	GZ44Y0R02H8ICU	Osj010790	C2H2	S
TFDB	GZ44Y0R02HANVT	Ath012133	C2H2	S
TFDB	GZ44Y0R02HBSSB	Osj000236	C2H2	S
TFDB	GZ44Y0R02HBY32	Ath015933	C2H2	G
TFDB	GZ44Y0R02HCP6M	Ath009582	C2H2	G
TFDB	GZ44Y0R02HOLMO	Osj019155	C2H2	E
TFDB	GZ44Y0R02HYNYP	Ath031600	C2H2	E
TFDB	GZ44Y0R02I1Z0G	Osj017041	C2H2	S
TFDB	GZ44Y0R02IGD58	Osj000236	C2H2	G
TFDB	GZ44Y0R02IIFDE	Ath012133	C2H2	G
TFDB	GZ44Y0R02JGA4S	Osj010790	C2H2	S
TFDB	GZ44Y0R02JJ6S1	Ath029140	C2H2	S
TFDB	GZ44Y0R02JJE10	Ath012133	C2H2	G
TFDB	GZ44Y0R02JNMJX	Osj033685	C2H2	G
TFDB	newbler-isotig00980	Ath018535	C2H2	G, S
TFDB	newbler-isotig00981	Ath018535	C2H2	G, S
TFDB	newbler-isotig01113	Osj052878	C2H2	S
TFDB	newbler-isotig02073	Osj008832	C2H2	G, S
TFDB	newbler-isotig08925	Ath020239	C2H2	E, G, S
TFDB	Singletons11847	Osj008771	C2H2	S
TFDB	Singletons11980	Osj017041	C2H2	S
TFDB	Singletons12702	Osj050406	C2H2	E, S
TFDB	Singletons13360	Osj019155	C2H2	S
TFDB	Singletons13632	Ath020239	C2H2	S
TFDB	Singletons13788	Osj009784	C2H2	E, S
TFDB	Singletons14669	Ath012259	C2H2	G
TFDB	Singletons15334	Osj019155	C2H2	E, G
TFDB	Singletons15374	Ath023002	C2H2	G
TFDB	Singletons202689	Ath028717	C2H2	S
TFDB	Singletons204227	Ath012917	C2H2	S
TFDB	Singletons204881	Osj053515	C2H2	S
TFDB	Singletons206011	Ath012133	C2H2	G
TFDB	Singletons207148	Osj019155	C2H2	S
TFDB	Singletons208975	Osj008832	C2H2	S
TFDB	Singletons209864	Ath009582	C2H2	S
TFDB	Singletons210248	Osj053859	C2H2	S
TFDB	Singletons210469	Ath012133	C2H2	G, S
TFDB	Singletons210902	Ath023002	C2H2	S
TFDB	Singletons212353	Osj041651	C2H2	S
TFDB	Singletons215835	Ath028460	C2H2	S
TFDB	Singletons219446	Osj005546	C2H2	S
TFDB	Singletons219820	Osj026607	C2H2	S
TFDB	Singletons221241	Osj035797	C2H2	S
TFDB	Singletons222486	Osj003609	C2H2	E
TFDB	Singletons223957	Ath025639	C2H2	S
TFDB	Singletons224114	Ath028584	C2H2	E
TFDB	Singletons225239	Ath003203	C2H2	E, G
TFDB	Singletons225479	Ath019267	C2H2	G
TFDB	Singletons225865	Ath030103	C2H2	S
TFDB	Singletons226971	Ath012133	C2H2	E, S
TFDB	Singletons227913	Osj052878	C2H2	E, G, S
TFDB	Singletons228140	Ath012133	C2H2	G, S
TFDB	Singletons228271	Ath022101	C2H2	S
TFDB	Singletons228534	Osj010790	C2H2	G, S
TFDB	Singletons228628	Osj020096	C2H2	S
TFDB	Singletons230111	Ath002193	C2H2	S
TFDB	Singletons230276	Ath023002	C2H2	S
TFDB	Singletons230287	Osj019155	C2H2	G
TFDB	Singletons230807	Osj008832	C2H2	E, G, S
TFDB	Singletons231474	Osj009784	C2H2	S
TFDB	Singletons231749	Osj046989	C2H2	E
TFDB	Singletons233022	Osj003447	C2H2	S
TFDB	Singletons233138	Ath028460	C2H2	S
TFDB	Singletons234452	Osj000236	C2H2	G, S
TFDB	Singletons234759	Osj005546	C2H2	G, S
TFDB	Singletons235418	Osj010007	C2H2	S
TFDB	Singletons236241	Ath012133	C2H2	G
TFDB	Singletons237335	Osj019155	C2H2	S
TFDB	Singletons2735	Ath030103	C2H2	E, G, S
TFDB	Singletons4511	Ath031066	C2H2	E, G
TFDB	Singletons5093	Ath023002	C2H2	E, S
TFDB	Singletons5864	Ath019267	C2H2	G
TFDB	Singletons5867	Osj010790	C2H2	G, S
TFDB	Singletons6873	Ath023002	C2H2	S
TFDB	Singletons7902	Ath012133	C2H2	S
TFDB	539	Ath004650	C3H	E, G, S
TFDB	679	Ath005928	C3H	E, G, S	E, G, S*
TFDB	1137	Ath024739	C3H	E, G, S
TFDB	1297	Ath031191	C3H	E, G, S
TFDB	1612	Ath022480	C3H	E, G, S
TFDB	1954	Ath020393	C3H	E, G, S	E
TFDB	3076	Osj012494	C3H	E, G, S	E, G, S*
TFDB	3098	Osj047570	C3H	E, G, S
TFDB	3126	Ath005928	C3H	E, G, S
TFDB	3491	Ath005928	C3H	E, G, S
TFDB	3493	Ath022480	C3H	E, G, S
TFDB	3999	Osj036668	C3H	E, G, S	E*
TFDB	4082	Ath005312	C3H	E, G, S
TFDB	4087	Ath024969	C3H	E, G, S
TFDB	4472	Osj040991	C3H	E, G, S
TFDB	4558	Osj013287	C3H	E, G, S
TFDB	5335	Osj056881	C3H	E, G, S
TFDB	5372	Osj015920	C3H	E, G, S
TFDB	5390	Osj022021	C3H	E, G, S
TFDB	5395	Ath002266	C3H	E, G, S
TFDB	GZ44Y0R01A9KCX	Osj046925	C3H	G
TFDB	GZ44Y0R01AHPTZ	Ath008848	C3H	S
TFDB	GZ44Y0R01AIL92	Ath010294	C3H	S
TFDB	GZ44Y0R01AL0KB	Osj001306	C3H	G
TFDB	GZ44Y0R01APA0N	Osj001306	C3H	G
TFDB	GZ44Y0R01AQ2XW	Ath005312	C3H	G
TFDB	GZ44Y0R01AS9RZ	Ath010294	C3H	S
TFDB	GZ44Y0R01ATIRJ	Osj056436	C3H	S
TFDB	GZ44Y0R01AUSGJ	Osj001306	C3H	G
TFDB	GZ44Y0R01B2833	Osj010918	C3H	S
TFDB	GZ44Y0R01B4EWB	Osj036012	C3H	S
TFDB	GZ44Y0R01B5BH5	Osj036012	C3H	E
TFDB	GZ44Y0R01BOUKK	Osj036487	C3H	S
TFDB	GZ44Y0R01BTBUI	Ath010781	C3H	S
TFDB	GZ44Y0R01BX3J0	Osj025086	C3H	S
TFDB	GZ44Y0R01C0297	Osj027183	C3H	E
TFDB	GZ44Y0R01CA8CN	Ath005312	C3H	G
TFDB	GZ44Y0R01CCEP6	Ath005928	C3H	E
TFDB	GZ44Y0R01CCVDM	Osj025086	C3H	G
TFDB	GZ44Y0R01CJLN2	Osj002152	C3H	E
TFDB	GZ44Y0R01CYKXN	Ath024969	C3H	E
TFDB	GZ44Y0R01D4H4L	Ath003503	C3H	E
TFDB	GZ44Y0R01D7MFK	Ath021105	C3H	G
TFDB	GZ44Y0R01D9CZ4	Osj031894	C3H	S
TFDB	GZ44Y0R01DFKP6	Osj020514	C3H	S
TFDB	GZ44Y0R01DO8QQ	Ath024969	C3H	S
TFDB	GZ44Y0R01DODPB	Ath004650	C3H	G
TFDB	GZ44Y0R01EFAQF	Osj046150	C3H	S
TFDB	GZ44Y0R01EOER6	Osj040991	C3H	E
TFDB	GZ44Y0R01EP604	Osj036012	C3H	E
TFDB	GZ44Y0R02F6QW0	Osj024980	C3H	S
TFDB	GZ44Y0R02F8MQQ	Osj025086	C3H	S
TFDB	GZ44Y0R02FPBGJ	Osj040991	C3H	E
TFDB	GZ44Y0R02FQQHU	Osj058024	C3H	S
TFDB	GZ44Y0R02G38NC	Osj040991	C3H	G
TFDB	GZ44Y0R02GKDCE	Ath021105	C3H	G
TFDB	GZ44Y0R02GR8IC	Osj012701	C3H	S
TFDB	GZ44Y0R02GYIND	Osj019934	C3H	S
TFDB	GZ44Y0R02H35NF	Ath003503	C3H	S
TFDB	GZ44Y0R02H4TTC	Osj015920	C3H	G
TFDB	GZ44Y0R02H5OBV	Osj056881	C3H	G
TFDB	GZ44Y0R02HA7SP	Ath023456	C3H	G
TFDB	GZ44Y0R02HOKWA	Ath024969	C3H	G
TFDB	GZ44Y0R02I0HW6	Osj001042	C3H	S
TFDB	GZ44Y0R02IAMWF	Osj027183	C3H	S
TFDB	GZ44Y0R02IC94O	Ath004650	C3H	S
TFDB	GZ44Y0R02IRRPA	Ath008848	C3H	S
TFDB	GZ44Y0R02J0JL0	Osj046150	C3H	E
TFDB	GZ44Y0R02J3A5X	Ath003503	C3H	E
TFDB	newbler-isotig07000	Osj012494	C3H	E, G, S
TFDB	Singletons10219	Ath017690	C3H	S
TFDB	Singletons10739	Ath022480	C3H	S
TFDB	Singletons11145	Osj002128	C3H	S
TFDB	Singletons11162	Osj010670	C3H	G
TFDB	Singletons11339	Ath024969	C3H	S
TFDB	Singletons11670	Osj031894	C3H	S
TFDB	Singletons12204	Osj036012	C3H	E, S
TFDB	Singletons13362	Ath024969	C3H	S
TFDB	Singletons13837	Ath005928	C3H	E
TFDB	Singletons14037	Osj019974	C3H	S
TFDB	Singletons14282	Ath024739	C3H	S
TFDB	Singletons14791	Osj025086	C3H	S
TFDB	Singletons14825	Osj022021	C3H	S
TFDB	Singletons15299	Ath003503	C3H	E, S
TFDB	Singletons202433	Osj031894	C3H	S	G
TFDB	Singletons204614	Ath003503	C3H	S
TFDB	Singletons207331	Osj031894	C3H	S
TFDB	Singletons208203	Ath003503	C3H	S
TFDB	Singletons209034	Osj031894	C3H	S
TFDB	Singletons209096	Ath006017	C3H	S
TFDB	Singletons210174	Osj036012	C3H	S
TFDB	Singletons211208	Osj010918	C3H	S
TFDB	Singletons211253	Ath004650	C3H	G
TFDB	Singletons211777	Ath005312	C3H	G, S
TFDB	Singletons212438	Ath003503	C3H	E
TFDB	Singletons213117	Osj027183	C3H	E, S
TFDB	Singletons213661	Osj036487	C3H	G, S
TFDB	Singletons214529	Osj010918	C3H	S
TFDB	Singletons214707	Ath004650	C3H	G
TFDB	Singletons215307	Osj049518	C3H	S
TFDB	Singletons217621	Osj046150	C3H	S
TFDB	Singletons217768	Ath005928	C3H	S	S
TFDB	Singletons219704	Ath024969	C3H	S
TFDB	Singletons223159	Osj046150	C3H	S
TFDB	Singletons223286	Osj034537	C3H	S
TFDB	Singletons223630	Osj013287	C3H	S
TFDB	Singletons223716	Ath017690	C3H	S
TFDB	Singletons224648	Osj055940	C3H	G, S
TFDB	Singletons225335	Ath024969	C3H	S
TFDB	Singletons226111	Osj009896	C3H	S
TFDB	Singletons226573	Ath003503	C3H	S
TFDB	Singletons226577	Ath004650	C3H	S
TFDB	Singletons226615	Osj056881	C3H	G, S
TFDB	Singletons227345	Osj006577	C3H	S
TFDB	Singletons227371	Osj012701	C3H	S
TFDB	Singletons228636	Ath024969	C3H	E
TFDB	Singletons228668	Osj010670	C3H	G, S
TFDB	Singletons229259	Ath027948	C3H	S
TFDB	Singletons229463	Ath024969	C3H	G
TFDB	Singletons230302	Osj001306	C3H	G
TFDB	Singletons230668	Ath003503	C3H	S
TFDB	Singletons231221	Ath010294	C3H	G, S
TFDB	Singletons231722	Osj022021	C3H	S
TFDB	Singletons232218	Ath003503	C3H	S
TFDB	Singletons232273	Osj027183	C3H	S
TFDB	Singletons233136	Osj044533	C3H	G
TFDB	Singletons233343	Osj027183	C3H	S
TFDB	Singletons233473	Osj027183	C3H	S
TFDB	Singletons233992	Osj010670	C3H	S
TFDB	Singletons234122	Osj036012	C3H	E, S
TFDB	Singletons234475	Ath026786	C3H	G
TFDB	Singletons234635	Osj046925	C3H	G, S
TFDB	Singletons234652	Ath003503	C3H	E, G
TFDB	Singletons234769	Osj034537	C3H	S
TFDB	Singletons234806	Ath001143	C3H	S
TFDB	Singletons235104	Osj046150	C3H	E, S
TFDB	Singletons235187	Osj046150	C3H	S
TFDB	Singletons235203	Osj035966	C3H	S
TFDB	Singletons235267	Ath005928	C3H	E, G
TFDB	Singletons235370	Osj022021	C3H	E, S
TFDB	Singletons235439	Osj055940	C3H	S
TFDB	Singletons235488	Osj046150	C3H	S
TFDB	Singletons235520	Ath024739	C3H	S	E, G*
TFDB	Singletons235537	Osj027183	C3H	S
TFDB	Singletons235866	Osj020514	C3H	S
TFDB	Singletons236024	Osj010670	C3H	S
TFDB	Singletons236119	Osj025086	C3H	S
TFDB	Singletons236624	Ath024969	C3H	S
TFDB	Singletons236636	Ath003503	C3H	E, G, S
TFDB	Singletons236641	Osj010578	C3H	G, S
TFDB	Singletons236787	Osj057981	C3H	S
TFDB	Singletons237188	Ath024739	C3H	S	E, G*
TFDB	Singletons237351	Ath024969	C3H	G, S
TFDB	Singletons237416	Osj040991	C3H	E, G, S
TFDB	Singletons237482	Osj056436	C3H	S
TFDB	Singletons237644	Osj008426	C3H	E, G, S
TFDB	Singletons238055	Ath021105	C3H	G, S
TFDB	Singletons238076	Ath020352	C3H	E, G
TFDB	Singletons238231	Ath005312	C3H	G
TFDB	Singletons3231	Osj025086	C3H	S
TFDB	Singletons4295	Ath010781	C3H	S
TFDB	Singletons5420	Ath010294	C3H	S
TFDB	Singletons5527	Osj046150	C3H	G, S
TFDB	Singletons6114	Ath010294	C3H	S
TFDB	Singletons7230	Ath017690	C3H	S
TFDB	Singletons8482	Ath005312	C3H	S
TFDB	2837	Osj054876	CAMTA	E, G, S
TFDB	3372	Osj028973	CAMTA	E, G, S
TFDB	3899	Osj057503	CAMTA	E, G, S
TFDB	GZ44Y0R01AI0FZ	Ath023219	CAMTA	S
TFDB	GZ44Y0R01AIO1T	Osj015144	CAMTA	S
TFDB	GZ44Y0R01DVGRV	Osj057503	CAMTA	G
TFDB	GZ44Y0R02F936I	Osj057743	CAMTA	G
TFDB	GZ44Y0R02FPPA4	Osj028973	CAMTA	S
TFDB	GZ44Y0R02G977T	Osj054876	CAMTA	G
TFDB	GZ44Y0R02GJZ3Q	Osj028973	CAMTA	E
TFDB	GZ44Y0R02H11WG	Osj054876	CAMTA	S
TFDB	GZ44Y0R02HCFX8	Osj028973	CAMTA	G
TFDB	Singletons11529	Ath030124	CAMTA	S
TFDB	Singletons11934	Osj057743	CAMTA	S
TFDB	Singletons12834	Osj054876	CAMTA	S
TFDB	Singletons13451	Osj048980	CAMTA	G
TFDB	Singletons13887	Osj047984	CAMTA	S
TFDB	Singletons14792	Osj015144	CAMTA	S
TFDB	Singletons204277	Osj047984	CAMTA	G
TFDB	Singletons220720	Osj047984	CAMTA	G
TFDB	Singletons221458	Osj057503	CAMTA	S
TFDB	Singletons233448	Osj015144	CAMTA	S
TFDB	Singletons234262	Osj057503	CAMTA	S
TFDB	Singletons235178	Ath030124	CAMTA	S
TFDB	Singletons235204	Osj057503	CAMTA	S
TFDB	Singletons236410	Osj047984	CAMTA	S
TFDB	Singletons237684	Osj015144	CAMTA	G, S
TFDB	Singletons237886	Osj028973	CAMTA	E
TFDB	19	Osj042063	CO-like	E, G, S
TFDB	2210	Osj040084	CO-like	E, G, S
TFDB	2596	Ath015210	CO-like	E, G, S
TFDB	2912	Osj040084	CO-like	E, G, S
TFDB	4005	Osj027750	CO-like	E, G, S
TFDB	4360	Ath021510	CO-like	E, G, S
TFDB	4568	Ath003199	CO-like	E, G, S
TFDB	GZ44Y0R01BSE6L	Osj027015	CO-like	S
TFDB	GZ44Y0R01CWY36	Osj004150	CO-like	E
TFDB	GZ44Y0R01D8OWT	Osj040084	CO-like	G
TFDB	GZ44Y0R01DQJ14	Osj026768	CO-like	G
TFDB	GZ44Y0R01EHYY0	Osj004150	CO-like	S
TFDB	GZ44Y0R01EIZK7	Osj004150	CO-like	G
TFDB	GZ44Y0R02F4M6M	Osj004150	CO-like	S
TFDB	GZ44Y0R02FS1RQ	Ath003199	CO-like	S
TFDB	GZ44Y0R02G4SDQ	Ath028597	CO-like	S
TFDB	GZ44Y0R02GW5TE	Osj017387	CO-like	S
TFDB	GZ44Y0R02HC1N7	Osj004150	CO-like	S
TFDB	GZ44Y0R02JGA93	Ath028597	CO-like	S
TFDB	newbler-isotig00280	Osj042063	CO-like	S
TFDB	newbler-isotig05496	Osj046526	CO-like	E, G, S
TFDB	Singletons203954	Osj026768	CO-like	G, S
TFDB	Singletons205257	Osj040084	CO-like	S
TFDB	Singletons205790	Osj040084	CO-like	S
TFDB	Singletons211895	Osj004150	CO-like	E, G, S
TFDB	Singletons216573	Osj004150	CO-like	G, S
TFDB	Singletons225487	Ath008518	CO-like	S
TFDB	Singletons238014	Osj027015	CO-like	E, G, S
TFDB	GZ44Y0R01CA7J5	Osj004315	CPP	S
TFDB	GZ44Y0R02FZR97	Ath031517	CPP	S
TFDB	Singletons203602	Ath012850	CPP	S
TFDB	Singletons205445	Osj011516	CPP	S
TFDB	Singletons217091	Osj052452	CPP	S
TFDB	Singletons233331	Ath031517	CPP	S
TFDB	Singletons234254	Ath030823	CPP	S
TFDB	Singletons236740	Osj004315	CPP	S
TFDB	4621	Osj031112	DBB	E, G, S
TFDB	newbler-isotig01198	Osj034676	DBB	E, G, S
TFDB	newbler-isotig04256	Ath015330	DBB	E, G, S
TFDB	Singletons210727	Osj043592	DBB	G
TFDB	Singletons215922	Ath028795	DBB	S
TFDB	Singletons225525	Osj003997	DBB	S
TFDB	Singletons484	Osj034676	DBB	S	S
TFDB	GZ44Y0R01B06LL	Osj038477	Dof	G
TFDB	GZ44Y0R01B7PIK	Ath010148	Dof	S
TFDB	GZ44Y0R01BNPXP	Osj030328	Dof	G
TFDB	GZ44Y0R01CQJ5M	Ath001799	Dof	G
TFDB	GZ44Y0R01D9XMM	Osj006639	Dof	E
TFDB	GZ44Y0R01EDKE1	Osj018479	Dof	G
TFDB	GZ44Y0R02HHIQK	Osj007593	Dof	S
TFDB	GZ44Y0R02HHWZ6	Osj038477	Dof	G
TFDB	GZ44Y0R02IEI8V	Osj006639	Dof	E
TFDB	GZ44Y0R02IUIVS	Ath007056	Dof	E
TFDB	GZ44Y0R02JGSYT	Ath011142	Dof	S
TFDB	GZ44Y0R02JQ9YT	Osj014937	Dof	G
TFDB	newbler-isotig03708	Ath006547	Dof	E, G, S
TFDB	Singletons11233	Ath023453	Dof	S
TFDB	Singletons213216	Osj038477	Dof	G
TFDB	Singletons220264	Osj018479	Dof	E, G
TFDB	Singletons224670	Ath011142	Dof	E
TFDB	Singletons231800	Osj006639	Dof	E, S
TFDB	Singletons232227	Osj030328	Dof	G, S
TFDB	Singletons237266	Osj018132	Dof	E, G
TFDB	Singletons4070	Osj018479	Dof	S
TFDB	Singletons8972	Ath026295	Dof	E, S
TFDB	2110	Osj030401	E2F/DP	E, G, S
TFDB	GZ44Y0R01AG0I6	Osj004241	E2F/DP	G
TFDB	GZ44Y0R01BSLOM	Osj026636	E2F/DP	G
TFDB	GZ44Y0R01CU4MC	Osj026636	E2F/DP	G
TFDB	GZ44Y0R01EJOX5	Osj004241	E2F/DP	G
TFDB	GZ44Y0R02H1RAB	Osj026636	E2F/DP	G
TFDB	GZ44Y0R02HHBXN	Osj015529	E2F/DP	S
TFDB	Singletons12212	Ath024678	E2F/DP	G
TFDB	Singletons1642	Osj004241	E2F/DP	G, S
TFDB	Singletons208764	Osj020561	E2F/DP	G, S
TFDB	Singletons227213	Osj026636	E2F/DP	E, G
TFDB	Singletons231312	Ath016807	E2F/DP	S
TFDB	2151	Ath024966	EIL	E, G, S
TFDB	5403	Osj027955	EIL	E, G, S
TFDB	GZ44Y0R01CHEMB	Osj046158	EIL	G
TFDB	GZ44Y0R02G2RQ2	Ath025917	EIL	G
TFDB	GZ44Y0R02GLZ8Y	Osj010216	EIL	G
TFDB	GZ44Y0R02HKQY6	Osj058203	EIL	G
TFDB	Singletons11819	Osj010216	EIL	G
TFDB	Singletons14306	Osj030028	EIL	S
TFDB	Singletons220854	Osj046158	EIL	G
TFDB	Singletons226417	Osj046158	EIL	S
TFDB	Singletons227571	Osj030028	EIL	S
TFDB	Singletons232340	Osj046158	EIL	G
TFDB	Singletons232557	Ath025917	EIL	S
TFDB	Singletons3461	Osj030028	EIL	G, S
TFDB	Singletons5642	Osj030028	EIL	S
TFDB	735	Osj017237	ERF	E, G, S
TFDB	767	Ath008884	ERF	E, G, S
TFDB	783	Osj017003	ERF	E, G, S	E, G, S*
TFDB	1949	Osj007743	ERF	E, G, S
TFDB	2299	Ath010787	ERF	E, G, S
TFDB	2719	Osj010919	ERF	E, G, S
TFDB	2897	Osj017003	ERF	E, G, S	G, S*
TFDB	5272	Osj007743	ERF	E, G, S
TFDB	GZ44Y0R01AE0G6	Osj045859	ERF	S
TFDB	GZ44Y0R01BCNMX	Osj025269	ERF	S
TFDB	GZ44Y0R01BETUS	Osj045859	ERF	S
TFDB	GZ44Y0R01BF4P1	Ath021156	ERF	E
TFDB	GZ44Y0R01DBRGF	Osj009298	ERF	S
TFDB	GZ44Y0R01DBWE6	Ath010056	ERF	S
TFDB	GZ44Y0R01DFZYE	Ath010056	ERF	S
TFDB	GZ44Y0R01DI685	Osj049916	ERF	G
TFDB	GZ44Y0R01DPLWV	Ath009106	ERF	S
TFDB	GZ44Y0R01EYE3A	Osj009298	ERF	S
TFDB	GZ44Y0R02F2JYP	Osj009298	ERF	G
TFDB	GZ44Y0R02FX039	Osj045859	ERF	G
TFDB	GZ44Y0R02HAWAW	Osj008140	ERF	S
TFDB	GZ44Y0R02ISJ6Y	Osj008140	ERF	S
TFDB	newbler-isotig01320	Osj025269	ERF	E, G, S
TFDB	newbler-isotig02988	Osj017003	ERF	E, G, S	E, G, S*
TFDB	newbler-isotig05660	Osj028234	ERF	E, G, S
TFDB	Singletons13737	Osj045859	ERF	S
TFDB	Singletons204136	Osj045939	ERF	S
TFDB	Singletons210170	Osj045939	ERF	S
TFDB	Singletons210749	Osj045859	ERF	S
TFDB	Singletons211149	Ath023318	ERF	S
TFDB	Singletons214176	Osj006225	ERF	S
TFDB	Singletons215297	Osj006225	ERF	S
TFDB	Singletons215481	Osj045859	ERF	S
TFDB	Singletons222853	Ath007405	ERF	S
TFDB	Singletons223590	Osj045859	ERF	S
TFDB	Singletons228009	Osj045859	ERF	S
TFDB	Singletons228716	Ath017830	ERF	S
TFDB	Singletons229210	Ath027823	ERF	S
TFDB	Singletons229489	Osj045859	ERF	S
TFDB	Singletons231895	Osj045859	ERF	G
TFDB	Singletons234193	Osj009298	ERF	E, G, S
TFDB	Singletons235699	Ath017597	ERF	E, G, S
TFDB	Singletons236109	Osj045859	ERF	S
TFDB	Singletons236425	Osj045859	ERF	S
TFDB	Singletons237494	Osj045859	ERF	S
TFDB	Singletons237616	Osj022236	ERF	G
TFDB	Singletons5204	Osj045859	ERF	E, G, S
TFDB	Singletons7315	Osj045859	ERF	S
TFDB	5119	Osj052515	FAR1	E, G, S
TFDB	GZ44Y0R01A3VQC	Osj044905	FAR1	S
TFDB	GZ44Y0R01AP865	Osj044905	FAR1	S
TFDB	GZ44Y0R01ATK1Y	Osj044905	FAR1	S
TFDB	GZ44Y0R01B7BDP	Osj056376	FAR1	E
TFDB	GZ44Y0R01BMC6P	Osj044682	FAR1	S
TFDB	GZ44Y0R01BUI2T	Osj033230	FAR1	G
TFDB	GZ44Y0R01C2VTH	Osj041581	FAR1	S
TFDB	GZ44Y0R01CESEV	Osj044682	FAR1	G
TFDB	GZ44Y0R01CQ5BV	Osj044682	FAR1	G
TFDB	GZ44Y0R01CSN3Z	Osj003947	FAR1	S
TFDB	GZ44Y0R01CSX65	Osj034267	FAR1	S
TFDB	GZ44Y0R01CY18Y	Osj007605	FAR1	S
TFDB	GZ44Y0R01DGSZU	Osj028245	FAR1	G
TFDB	GZ44Y0R01EQM3M	Osj017554	FAR1	G
TFDB	GZ44Y0R01EV1KG	Osj004517	FAR1	G
TFDB	GZ44Y0R02FLAOR	Osj044905	FAR1	E
TFDB	GZ44Y0R02GIWUH	Osj044905	FAR1	S
TFDB	GZ44Y0R02HCDYY	Osj044682	FAR1	E
TFDB	GZ44Y0R02HE5TB	Ath003870	FAR1	G
TFDB	GZ44Y0R02HH4I7	Osj007605	FAR1	G
TFDB	GZ44Y0R02IE0D3	Ath010901	FAR1	G
TFDB	GZ44Y0R02JHXW6	Osj028245	FAR1	G
TFDB	GZ44Y0R02JM4EF	Osj033230	FAR1	S
TFDB	GZ44Y0R02JMCVB	Osj041581	FAR1	E
TFDB	GZ44Y0R02JTGZF	Osj038155	FAR1	S
TFDB	newbler-isotig01866	Osj003947	FAR1	G, S
TFDB	newbler-isotig01867	Osj003947	FAR1	G
TFDB	Singletons10441	Osj056743	FAR1	S
TFDB	Singletons10740	Ath003870	FAR1	S
TFDB	Singletons11801	Osj041581	FAR1	S
TFDB	Singletons12352	Osj044682	FAR1	S
TFDB	Singletons12527	Osj044905	FAR1	E, G, S
TFDB	Singletons12925	Osj044682	FAR1	E, G
TFDB	Singletons13125	Osj004517	FAR1	E, G, S
TFDB	Singletons13587	Osj052515	FAR1	G
TFDB	Singletons14195	Osj004517	FAR1	S
TFDB	Singletons14461	Osj033230	FAR1	E, G, S
TFDB	Singletons15295	Osj007605	FAR1	E, G, S
TFDB	Singletons15324	Osj052515	FAR1	E, G
TFDB	Singletons200562	Ath026575	FAR1	S
TFDB	Singletons205529	Ath028755	FAR1	S
TFDB	Singletons205556	Osj017554	FAR1	S
TFDB	Singletons210183	Ath015375	FAR1	S
TFDB	Singletons210253	Osj046692	FAR1	S
TFDB	Singletons210802	Osj052515	FAR1	S
TFDB	Singletons211091	Osj044905	FAR1	S
TFDB	Singletons211122	Osj044682	FAR1	S
TFDB	Singletons211829	Ath026575	FAR1	S
TFDB	Singletons212885	Osj004517	FAR1	S
TFDB	Singletons213887	Osj034267	FAR1	S
TFDB	Singletons214798	Osj020550	FAR1	S
TFDB	Singletons214872	Ath010901	FAR1	S
TFDB	Singletons215453	Osj004517	FAR1	S
TFDB	Singletons216206	Osj044682	FAR1	E
TFDB	Singletons217079	Osj033419	FAR1	S
TFDB	Singletons219086	Osj056743	FAR1	S
TFDB	Singletons219167	Osj020550	FAR1	S
TFDB	Singletons220902	Osj056743	FAR1	S
TFDB	Singletons221136	Ath010901	FAR1	S
TFDB	Singletons222179	Osj044682	FAR1	S
TFDB	Singletons222733	Ath015375	FAR1	S
TFDB	Singletons223203	Osj056743	FAR1	S
TFDB	Singletons223322	Ath028521	FAR1	S
TFDB	Singletons223419	Osj020550	FAR1	S
TFDB	Singletons223609	Osj052515	FAR1	S
TFDB	Singletons225154	Ath015375	FAR1	S
TFDB	Singletons225666	Osj034267	FAR1	S
TFDB	Singletons227000	Osj003947	FAR1	S	E
TFDB	Singletons227890	Osj041581	FAR1	E, G
TFDB	Singletons228005	Osj034267	FAR1	S
TFDB	Singletons228598	Osj044682	FAR1	S
TFDB	Singletons228738	Ath015375	FAR1	S
TFDB	Singletons228946	Osj046692	FAR1	S
TFDB	Singletons229705	Osj033419	FAR1	S
TFDB	Singletons229750	Osj004517	FAR1	S
TFDB	Singletons230343	Osj000457	FAR1	S
TFDB	Singletons230722	Osj020550	FAR1	S
TFDB	Singletons230829	Ath010901	FAR1	S
TFDB	Singletons230857	Osj044905	FAR1	E, G
TFDB	Singletons231306	Osj041581	FAR1	S
TFDB	Singletons232175	Osj003947	FAR1	S
TFDB	Singletons232898	Osj033230	FAR1	S
TFDB	Singletons232988	Osj044905	FAR1	E, G
TFDB	Singletons233011	Ath015375	FAR1	S
TFDB	Singletons233587	Osj034267	FAR1	S
TFDB	Singletons233717	Osj020550	FAR1	G
TFDB	Singletons233818	Osj050134	FAR1	S
TFDB	Singletons234064	Osj034267	FAR1	E, G, S
TFDB	Singletons234742	Osj052515	FAR1	E, G
TFDB	Singletons234745	Osj044905	FAR1	S
TFDB	Singletons235437	Osj049492	FAR1	S
TFDB	Singletons235500	Osj004517	FAR1	E, G
TFDB	Singletons235641	Osj034267	FAR1	S
TFDB	Singletons235762	Ath003870	FAR1	S
TFDB	Singletons235817	Osj049492	FAR1	S
TFDB	Singletons235908	Osj034267	FAR1	S
TFDB	Singletons235958	Osj056376	FAR1	S
TFDB	Singletons236843	Osj044682	FAR1	S
TFDB	Singletons237177	Osj023118	FAR1	G
TFDB	Singletons237236	Osj056376	FAR1	S
TFDB	Singletons237319	Osj056376	FAR1	G
TFDB	Singletons237405	Osj049492	FAR1	S
TFDB	Singletons237541	Osj052515	FAR1	S
TFDB	Singletons237657	Osj044682	FAR1	E
TFDB	Singletons238182	Osj028245	FAR1	E, S
TFDB	Singletons2756	Osj034267	FAR1	S
TFDB	Singletons4914	Ath010901	FAR1	S
TFDB	Singletons5166	Osj044905	FAR1	E
TFDB	Singletons5859	Osj052515	FAR1	S
TFDB	Singletons6080	Osj046692	FAR1	S
TFDB	Singletons6302	Osj033230	FAR1	S
TFDB	Singletons6836	Osj017554	FAR1	S
TFDB	Singletons778	Osj049492	FAR1	E
TFDB	Singletons8191	Osj033419	FAR1	S
TFDB	Singletons8708	Ath015375	FAR1	S
TFDB	Singletons8912	Osj028245	FAR1	G, S
TFDB	Singletons95	Osj049492	FAR1	S
TFDB	Singletons9665	Osj044905	FAR1	S
TFDB	159	Osj000843	G2-like	E, G, S	E, G, S*
TFDB	952	Osj000843	G2-like	E, G, S	E, S*
TFDB	956	Osj000843	G2-like	E, G, S	E, G, S*
TFDB	1023	Osj000843	G2-like	E, G, S	E, G, S*
TFDB	1069	Osj000843	G2-like	E, G, S	E, S*
TFDB	1219	Osj000843	G2-like	E, G, S
TFDB	2800	Osj007369	G2-like	E, G
TFDB	GZ44Y0R01A4C8M	Osj041467	G2-like	G
TFDB	GZ44Y0R01AQFKJ	Osj041467	G2-like	S
TFDB	GZ44Y0R01B8FGU	Osj013068	G2-like	G
TFDB	GZ44Y0R01BFGC6	Osj020066	G2-like	S
TFDB	GZ44Y0R01BS88D	Osj028700	G2-like	G
TFDB	GZ44Y0R01BVGKC	Osj013068	G2-like	G
TFDB	GZ44Y0R01BW818	Osj058035	G2-like	G
TFDB	GZ44Y0R01CTOFR	Osj058035	G2-like	S
TFDB	GZ44Y0R01CV4ZW	Osj045165	G2-like	G
TFDB	GZ44Y0R01D4GPZ	Osj013068	G2-like	G
TFDB	GZ44Y0R01DAF92	Ath014292	G2-like	S
TFDB	GZ44Y0R01DBPUK	Osj020066	G2-like	S
TFDB	GZ44Y0R01DCI1D	Osj000843	G2-like	G
TFDB	GZ44Y0R01DCMA3	Osj051950	G2-like	S
TFDB	GZ44Y0R01DQ0JU	Osj016074	G2-like	E
TFDB	GZ44Y0R01EGJB8	Osj027418	G2-like	S
TFDB	GZ44Y0R01ENCLR	Osj013669	G2-like	S
TFDB	GZ44Y0R01EQXEN	Osj010655	G2-like	G
TFDB	GZ44Y0R01EZBVH	Osj035767	G2-like	G
TFDB	GZ44Y0R02F7LSK	Ath001035	G2-like	G
TFDB	GZ44Y0R02FNH1Q	Osj010655	G2-like	E
TFDB	GZ44Y0R02G2M35	Osj009754	G2-like	S
TFDB	GZ44Y0R02GEV0F	Ath006207	G2-like	S
TFDB	GZ44Y0R02GGG1N	Osj000843	G2-like	G
TFDB	GZ44Y0R02GKBGA	Osj036385	G2-like	G
TFDB	GZ44Y0R02GM1O1	Osj000843	G2-like	S
TFDB	GZ44Y0R02GUUNS	Osj016074	G2-like	G
TFDB	GZ44Y0R02HQYDY	Osj016074	G2-like	S
TFDB	GZ44Y0R02HZHSL	Osj013068	G2-like	G
TFDB	GZ44Y0R02I5SGM	Osj019072	G2-like	G
TFDB	GZ44Y0R02I629H	Osj000843	G2-like	G
TFDB	GZ44Y0R02IFWSV	Osj027418	G2-like	S
TFDB	GZ44Y0R02IW5EI	Osj036385	G2-like	G
TFDB	GZ44Y0R02JHU89	Osj036385	G2-like	G
TFDB	Singletons10081	Osj000843	G2-like	S
TFDB	Singletons10635	Osj034976	G2-like	S
TFDB	Singletons11089	Osj013669	G2-like	G, S
TFDB	Singletons13010	Osj010655	G2-like	S
TFDB	Singletons14587	Ath001284	G2-like	G, S
TFDB	Singletons14843	Osj000843	G2-like	S
TFDB	Singletons200261	Ath006207	G2-like	G
TFDB	Singletons202876	Osj027418	G2-like	S
TFDB	Singletons205893	Osj013068	G2-like	G
TFDB	Singletons205924	Osj016074	G2-like	E, G, S
TFDB	Singletons209082	Osj000843	G2-like	S
TFDB	Singletons214598	Osj051950	G2-like	G
TFDB	Singletons218480	Ath013816	G2-like	S
TFDB	Singletons219052	Osj019072	G2-like	G
TFDB	Singletons219563	Ath006207	G2-like	S
TFDB	Singletons220211	Osj004043	G2-like	S
TFDB	Singletons226844	Osj027831	G2-like	S
TFDB	Singletons226845	Ath019544	G2-like	G, S
TFDB	Singletons229109	Ath021924	G2-like	S
TFDB	Singletons231882	Osj000843	G2-like	S
TFDB	Singletons231975	Ath026631	G2-like	S
TFDB	Singletons232718	Osj009754	G2-like	E, G, S
TFDB	Singletons233826	Osj028700	G2-like	G
TFDB	Singletons235190	Osj041467	G2-like	E, G, S
TFDB	Singletons236192	Osj013669	G2-like	E, G, S
TFDB	Singletons236566	Osj025541	G2-like	S
TFDB	Singletons4209	Osj000843	G2-like	G, S
TFDB	Singletons4229	Osj052601	G2-like	G
TFDB	Singletons4874	Osj050307	G2-like	E, G, S
TFDB	Singletons7891	Ath006207	G2-like	G
TFDB	Singletons8578	Osj000843	G2-like	S
TFDB	671	Osj004695	GATA	E, G, S
TFDB	731	Osj019064	GATA	E, G, S
TFDB	2189	Osj019064	GATA	E, G, S
TFDB	4480	Osj019064	GATA	E, G, S
TFDB	Singletons202782	Osj019742	GATA	S
TFDB	Singletons219621	Osj034663	GATA	S
TFDB	Singletons226612	Osj019064	GATA	S
TFDB	Singletons228592	Osj027368	GATA	S
TFDB	Singletons229028	Osj033906	GATA	S
TFDB	Singletons231855	Osj004695	GATA	E, G, S
TFDB	Singletons232185	Osj001210	GATA	S
TFDB	Singletons5354	Osj019064	GATA	S
TFDB	4546	Ath010279	GeBP	E, G, S
TFDB	GZ44Y0R01AXLBV	Osj014922	GeBP	G
TFDB	GZ44Y0R01C9A7A	Osj028285	GeBP	S
TFDB	GZ44Y0R01EC4CY	Ath010279	GeBP	G
TFDB	GZ44Y0R02GZTMI	Ath010279	GeBP	G
TFDB	GZ44Y0R02H8EQ7	Osj014922	GeBP	S
TFDB	GZ44Y0R02ICXUL	Osj014922	GeBP	G
TFDB	Singletons13915	Osj028285	GeBP	S
TFDB	Singletons214888	Ath010279	GeBP	G, S
TFDB	Singletons219323	Ath010279	GeBP	G
TFDB	Singletons222323	Osj028386	GeBP	S
TFDB	Singletons224089	Osj014922	GeBP	E, S
TFDB	Singletons230525	Osj028386	GeBP	G
TFDB	Singletons235116	Ath004299	GeBP	G
TFDB	Singletons235941	Osj031141	GeBP	G, S
TFDB	2327	Osj026822	GRAS	E, G, S
TFDB	2904	Osj028322	GRAS	E, G, S
TFDB	3191	Ath003753	GRAS	G, S
TFDB	3469	Osj029996	GRAS	E, G, S
TFDB	4513	Osj009914	GRAS	E, G, S
TFDB	4994	Osj010211	GRAS	E, G, S
TFDB	5180	Osj013191	GRAS	E, G, S
TFDB	5408	Osj026822	GRAS	E, G, S
TFDB	GZ44Y0R01A6ABM	Ath012100	GRAS	G
TFDB	GZ44Y0R01ALYUO	Osj012746	GRAS	G
TFDB	GZ44Y0R01CUIGN	Osj019448	GRAS	S
TFDB	GZ44Y0R01DMGEK	Osj038172	GRAS	G
TFDB	GZ44Y0R02FPZ38	Osj050331	GRAS	S
TFDB	GZ44Y0R02HJ9N6	Osj012746	GRAS	E
TFDB	GZ44Y0R02IXKSN	Osj029996	GRAS	S
TFDB	GZ44Y0R02IYXRW	Ath014129	GRAS	E
TFDB	GZ44Y0R02JHH93	Ath022554	GRAS	G
TFDB	GZ44Y0R02JPMDQ	Osj019448	GRAS	S
TFDB	GZ44Y0R02JSL9G	Osj019448	GRAS	G
TFDB	GZ44Y0R02JXT2U	Osj019448	GRAS	S
TFDB	newbler-isotig07622	Osj012746	GRAS	E, G, S
TFDB	newbler-isotig08172	Ath009307	GRAS	E, G, S
TFDB	Singletons10818	Osj030411	GRAS	S
TFDB	Singletons11873	Osj019448	GRAS	G, S
TFDB	Singletons1318	Ath012100	GRAS	S
TFDB	Singletons13829	Osj029996	GRAS	S
TFDB	Singletons14363	Ath030534	GRAS	S
TFDB	Singletons14638	Osj026822	GRAS	S
TFDB	Singletons201566	Osj019448	GRAS	S
TFDB	Singletons202455	Osj038172	GRAS	S
TFDB	Singletons206758	Osj047410	GRAS	S
TFDB	Singletons207484	Osj019448	GRAS	S
TFDB	Singletons207816	Osj002402	GRAS	S
TFDB	Singletons208732	Osj012746	GRAS	S
TFDB	Singletons213650	Ath014129	GRAS	S
TFDB	Singletons220350	Ath009307	GRAS	S
TFDB	Singletons221295	Ath020088	GRAS	S
TFDB	Singletons221619	Osj030411	GRAS	S
TFDB	Singletons222531	Osj019448	GRAS	S
TFDB	Singletons223021	Ath014129	GRAS	E
TFDB	Singletons223125	Osj051778	GRAS	S
TFDB	Singletons223798	Osj014929	GRAS	S
TFDB	Singletons226561	Ath010982	GRAS	S
TFDB	Singletons229330	Osj047410	GRAS	S
TFDB	Singletons230143	Osj019448	GRAS	S
TFDB	Singletons230602	Osj017588	GRAS	S
TFDB	Singletons233556	Osj012746	GRAS	G
TFDB	Singletons236524	Osj002785	GRAS	S
TFDB	Singletons236647	Osj038172	GRAS	S
TFDB	Singletons236865	Osj030397	GRAS	G
TFDB	Singletons237364	Ath008941	GRAS	S
TFDB	Singletons4485	Osj019448	GRAS	S
TFDB	Singletons7325	Osj019448	GRAS	S
TFDB	Singletons8054	Osj026822	GRAS	S
TFDB	Singletons9740	Osj051778	GRAS	G, S
TFDB	Singletons10473	Ath001468	GRF	G
TFDB	Singletons223698	Osj018466	GRF	S
TFDB	2402	Ath019487	HB-other	E, G, S
TFDB	4251	Ath011297	HB-other	E, G, S
TFDB	4983	Osj028602	HB-other	E, G
TFDB	GZ44Y0R01AD3EM	Ath019487	HB-other	S
TFDB	GZ44Y0R01APHHF	Ath019487	HB-other	G
TFDB	GZ44Y0R01BMGN3	Osj046743	HB-other	G
TFDB	GZ44Y0R01CJ4GG	Ath021673	HB-other	G
TFDB	GZ44Y0R01D9S5J	Ath019487	HB-other	S
TFDB	GZ44Y0R01EA8V0	Ath027878	HB-other	G
TFDB	GZ44Y0R01EAU6Q	Osj046743	HB-other	G
TFDB	GZ44Y0R02GZWFN	Osj018635	HB-other	G
TFDB	GZ44Y0R02IVVXP	Ath027878	HB-other	S
TFDB	GZ44Y0R02JCIHN	Ath022154	HB-other	G
TFDB	GZ44Y0R02JDZ8K	Ath019487	HB-other	G
TFDB	newbler-contig00062	Osj016793	HB-other	E, G, S
TFDB	Singletons11815	Ath019487	HB-other	G
TFDB	Singletons13271	Osj028602	HB-other	G
TFDB	Singletons14439	Osj028602	HB-other	S
TFDB	Singletons14925	Osj028602	HB-other	S
TFDB	Singletons15050	Osj028602	HB-other	S
TFDB	Singletons205383	Osj032588	HB-other	S
TFDB	Singletons205895	Osj046743	HB-other	G, S
TFDB	Singletons209261	Osj028602	HB-other	S
TFDB	Singletons223758	Ath019419	HB-other	S
TFDB	Singletons226813	Ath019487	HB-other	S
TFDB	Singletons227015	Ath022154	HB-other	G
TFDB	Singletons229426	Ath019487	HB-other	G
TFDB	Singletons229575	Ath022154	HB-other	G
TFDB	Singletons231143	Osj004558	HB-other	S
TFDB	Singletons232102	Osj004558	HB-other	S
TFDB	Singletons232765	Osj018635	HB-other	S
TFDB	Singletons235086	Ath021673	HB-other	S
TFDB	Singletons236458	Osj053782	HB-other	S
TFDB	Singletons236895	Ath019487	HB-other	G, S
TFDB	Singletons236962	Osj028602	HB-other	S
TFDB	Singletons2465	Ath003658	HB-other	S
TFDB	Singletons2855	Ath019487	HB-other	G
TFDB	Singletons5857	Osj018635	HB-other	E, G
TFDB	Singletons6298	Osj028602	HB-other	S
TFDB	Singletons6347	Ath019487	HB-other	S
TFDB	Singletons6854	Osj032588	HB-other	S
TFDB	Singletons9836	Ath019419	HB-other	S
TFDB	Singletons11594	Ath007611	HB-PHD	S
TFDB	Singletons234292	Osj055897	HB-PHD	G, S
TFDB	Singletons236422	Ath028260	HB-PHD	S
TFDB	Singletons237651	Osj055897	HB-PHD	S
TFDB	718	Ath028472	HD-ZIP	E, G, S
TFDB	2771	Osj006459	HD-ZIP	E, G, S
TFDB	4314	Osj003316	HD-ZIP	E, G, S
TFDB	4718	Ath020953	HD-ZIP	E, G, S
TFDB	GZ44Y0R01AC69D	Osj055300	HD-ZIP	E
TFDB	GZ44Y0R01BYF0F	Osj037151	HD-ZIP	G
TFDB	GZ44Y0R01CODLV	Osj043939	HD-ZIP	S
TFDB	GZ44Y0R01DAVCS	Osj055300	HD-ZIP	E
TFDB	GZ44Y0R01DTANQ	Osj020622	HD-ZIP	G
TFDB	GZ44Y0R01ED9A9	Osj033717	HD-ZIP	S
TFDB	GZ44Y0R01EGO54	Osj008379	HD-ZIP	S
TFDB	GZ44Y0R02F5TX8	Osj003316	HD-ZIP	G
TFDB	GZ44Y0R02F8WAF	Osj020622	HD-ZIP	G
TFDB	GZ44Y0R02FQPK6	Osj048805	HD-ZIP	G
TFDB	GZ44Y0R02GQNMP	Osj008379	HD-ZIP	E
TFDB	GZ44Y0R02GSHPL	Ath001183	HD-ZIP	S
TFDB	GZ44Y0R02HIMXW	Osj028031	HD-ZIP	G
TFDB	GZ44Y0R02INLCT	Osj003316	HD-ZIP	S
TFDB	Singletons10417	Osj020622	HD-ZIP	S
TFDB	Singletons13344	Ath023387	HD-ZIP	S
TFDB	Singletons14478	Osj020622	HD-ZIP	S
TFDB	Singletons15053	Osj047339	HD-ZIP	E, S
TFDB	Singletons15121	Osj020622	HD-ZIP	G
TFDB	Singletons201697	Osj042968	HD-ZIP	S
TFDB	Singletons206593	Osj016341	HD-ZIP	S
TFDB	Singletons210078	Osj003316	HD-ZIP	E, S
TFDB	Singletons210785	Ath026299	HD-ZIP	S
TFDB	Singletons210926	Osj006459	HD-ZIP	S
TFDB	Singletons211866	Ath025467	HD-ZIP	E, S
TFDB	Singletons215239	Osj048805	HD-ZIP	G
TFDB	Singletons215715	Osj003316	HD-ZIP	G
TFDB	Singletons218985	Osj003316	HD-ZIP	G
TFDB	Singletons219580	Osj003316	HD-ZIP	S
TFDB	Singletons220310	Osj047137	HD-ZIP	S
TFDB	Singletons222014	Osj037151	HD-ZIP	S
TFDB	Singletons222036	Osj042968	HD-ZIP	S
TFDB	Singletons222083	Ath019155	HD-ZIP	S
TFDB	Singletons222289	Ath025165	HD-ZIP	S
TFDB	Singletons223583	Osj023054	HD-ZIP	S
TFDB	Singletons226997	Osj037151	HD-ZIP	G
TFDB	Singletons228383	Ath026299	HD-ZIP	E
TFDB	Singletons230083	Ath019548	HD-ZIP	S
TFDB	Singletons230694	Osj001234	HD-ZIP	S
TFDB	Singletons230743	Osj023054	HD-ZIP	S
TFDB	Singletons235644	Osj055300	HD-ZIP	S
TFDB	Singletons4635	Ath027441	HD-ZIP	G
TFDB	Singletons6093	Osj033717	HD-ZIP	S
TFDB	Singletons6219	Ath001183	HD-ZIP	S
TFDB	Singletons6688	Ath001183	HD-ZIP	S
TFDB	Singletons8499	Osj043939	HD-ZIP	S
TFDB	1062	Osj023934	HSF	E, G, S
TFDB	5193	Osj019494	HSF	E, G, S
TFDB	5343	Osj047216	HSF	E, G, S
TFDB	GZ44Y0R01AYWZZ	Osj047216	HSF	S
TFDB	GZ44Y0R01CHZOA	Osj023934	HSF	S
TFDB	GZ44Y0R01CKII3	Ath026381	HSF	G
TFDB	GZ44Y0R01CU63N	Osj017979	HSF	S
TFDB	GZ44Y0R01DAKNI	Ath023312	HSF	G
TFDB	GZ44Y0R02FL7SR	Osj019692	HSF	S
TFDB	GZ44Y0R02FPKVG	Ath007910	HSF	G
TFDB	GZ44Y0R02GYJ7Y	Osj019494	HSF	G
TFDB	GZ44Y0R02HMZQW	Osj000505	HSF	G
TFDB	GZ44Y0R02IPBCH	Osj025408	HSF	G
TFDB	GZ44Y0R02IVKSB	Osj041413	HSF	E
TFDB	GZ44Y0R02J22LK	Osj041413	HSF	E
TFDB	GZ44Y0R02JKG83	Ath023229	HSF	G
TFDB	newbler-isotig06891	Osj042410	HSF	E, G, S
TFDB	Singletons11697	Ath023312	HSF	G, S
TFDB	Singletons13185	Osj019494	HSF	G	S
TFDB	Singletons13560	Osj052707	HSF	S
TFDB	Singletons13616	Osj023934	HSF	E, S
TFDB	Singletons14086	Osj010066	HSF	S
TFDB	Singletons14772	Osj041413	HSF	E, G
TFDB	Singletons207851	Ath026381	HSF	G
TFDB	Singletons209976	Osj047216	HSF	S
TFDB	Singletons213555	Osj041413	HSF	E, G
TFDB	Singletons225354	Osj019494	HSF	S
TFDB	Singletons229803	Osj041413	HSF	E, S
TFDB	Singletons232958	Osj019494	HSF	G
TFDB	Singletons234061	Osj019494	HSF	S
TFDB	Singletons237294	Osj041413	HSF	S
TFDB	Singletons5305	Osj019494	HSF	S
TFDB	Singletons8684	Osj008119	HSF	S
TFDB	3446	Osj005119	LBD	E, G, S
TFDB	GZ44Y0R01A02I9	Osj005119	LBD	S
TFDB	GZ44Y0R01AG8TU	Osj005119	LBD	S
TFDB	GZ44Y0R01AOV60	Osj014168	LBD	S
TFDB	GZ44Y0R01ATRU2	Osj005119	LBD	S
TFDB	GZ44Y0R01BWP12	Osj005119	LBD	E
TFDB	GZ44Y0R01CD9J0	Osj056507	LBD	S
TFDB	GZ44Y0R01CJ3DE	Osj005119	LBD	S
TFDB	GZ44Y0R01DOPRD	Ath029180	LBD	E
TFDB	GZ44Y0R02GHUH7	Ath029180	LBD	G
TFDB	Singletons13388	Osj005119	LBD	S
TFDB	Singletons13892	Osj005119	LBD	S
TFDB	Singletons15125	Osj005119	LBD	G, S
TFDB	Singletons211733	Osj005119	LBD	S
TFDB	Singletons215342	Osj012271	LBD	S
TFDB	Singletons221465	Ath003971	LBD	S
TFDB	Singletons221728	Ath015680	LBD	S
TFDB	Singletons228593	Ath007950	LBD	S
TFDB	Singletons229632	Osj043914	LBD	S
TFDB	Singletons237430	Osj005119	LBD	E, S
TFDB	Singletons238132	Osj005119	LBD	G, S
TFDB	Singletons3215	Osj005119	LBD	E, G, S
TFDB	Singletons9597	Osj005119	LBD	E, G
TFDB	GZ44Y0R01D7N81	Ath025435	LFY	S
TFDB	31	Osj030686	LSD	G, S
TFDB	1017	Ath018684	LSD	E, G, S
TFDB	3109	Osj030686	LSD	E, G, S
TFDB	GZ44Y0R02IRH11	Ath002017	LSD	S
TFDB	newbler-isotig00368	Osj030686	LSD	E, G, S
TFDB	newbler-isotig00369	Osj030686	LSD	E, G, S
TFDB	newbler-isotig00370	Osj030686	LSD	S
TFDB	Singletons14203	Ath002017	LSD	E, G, S
TFDB	516	Osj014983	MIKC	E, G, S
TFDB	779	Ath019890	MIKC	E, G, S
TFDB	890	Osj045751	MIKC	E, G, S		Orchid clade 3 DEFICIENS/APETALA3 homologue
TFDB	910	Osj009663	MIKC	E, G, S
TFDB	1430	Osj045751	MIKC	E, G, S		Orchid clade 2 DEFICIENS/APETALA3 homologue
TFDB	GZ44Y0R01A9VPV	Ath026428	MIKC	G
TFDB	GZ44Y0R01AOH1B	Ath022681	MIKC	S
TFDB	GZ44Y0R01AUQ2E	Osj020174	MIKC	G
TFDB	GZ44Y0R01CC8SY	Ath014303	MIKC	G
TFDB	GZ44Y0R01CT1PK	Ath026428	MIKC	S
TFDB	GZ44Y0R01CX0L5	Ath006016	MIKC	S
TFDB	GZ44Y0R01D1GAZ	Ath022681	MIKC	G
TFDB	GZ44Y0R01D2TW6	Osj042172	MIKC	S		Orchidoideae GLOBOSA1/PISTILLATA1 homologue
TFDB	GZ44Y0R01DDDRY	Osj000799	MIKC	G
TFDB	GZ44Y0R01DYTPE	Osj040781	MIKC	S
TFDB	GZ44Y0R01ETW1L	Ath022681	MIKC	E
TFDB	GZ44Y0R01EVMKO	Ath017084	MIKC	E
TFDB	GZ44Y0R02F4PMR	Osj035848	MIKC	E
TFDB	GZ44Y0R02FNL1O	Osj035714	MIKC	E
TFDB	GZ44Y0R02FXXJ4	Osj032101	MIKC	E
TFDB	GZ44Y0R02GTFQB	Osj000799	MIKC	G
TFDB	GZ44Y0R02HP3OF	Osj035848	MIKC	E
TFDB	GZ44Y0R02IOCZ7	Ath001446	MIKC	E
TFDB	GZ44Y0R02JPHPM	Ath012994	MIKC	G
TFDB	newbler-isotig02533	Ath001446	MIKC	E, G, S
TFDB	newbler-isotig03212	Osj009663	MIKC	E, G, S
TFDB	newbler-isotig03261	Osj014785	MIKC	E, G, S		Orchidoideae GLOBOSA2/PISTILLATA2 homologue
TFDB	newbler-isotig03543	Osj049617	MIKC	E, G, S
TFDB	newbler-isotig08448	Ath001446	MIKC	E, G, S
TFDB	Singletons11264	Osj035848	MIKC	E
TFDB	Singletons12063	Osj009492	MIKC	G, S
TFDB	Singletons14787	Osj042172	MIKC	S		Orchidoideae GLOBOSA1/PISTILLATA1 homologue
TFDB	Singletons203566	Ath001446	MIKC	E, G
TFDB	Singletons206876	Ath001446	MIKC	S
TFDB	Singletons207150	Osj045751	MIKC	S		Orchid clade 4 DEFICIENS/APETALA3 homologue
TFDB	Singletons213164	Osj035848	MIKC	E, G
TFDB	Singletons217146	Ath015248	MIKC	S
TFDB	Singletons219623	Osj035848	MIKC	E, G, S
TFDB	Singletons221119	Osj056218	MIKC	S		Orchidoideae GLOBOSA1/PISTILLATA1 homologue
TFDB	Singletons221916	Osj051428	MIKC	G, S
TFDB	Singletons223067	Ath022681	MIKC	E, G, S
TFDB	Singletons227100	Osj014983	MIKC	E, S
TFDB	Singletons228067	Ath026428	MIKC	G, S
TFDB	Singletons232187	Ath031203	MIKC	G
TFDB	Singletons236762	Osj016431	MIKC	G, S
TFDB	GZ44Y0R01A2K94	Ath031591	M-type	E
TFDB	GZ44Y0R01AIAJ0	Ath031591	M-type	G
TFDB	GZ44Y0R01AYM6L	Ath031591	M-type	G
TFDB	GZ44Y0R01DJ298	Osj057773	M-type	E
TFDB	GZ44Y0R02G3VNM	Osj000824	M-type	S
TFDB	GZ44Y0R02GDFJJ	Osj057773	M-type	E
TFDB	GZ44Y0R02GPIUY	Ath031591	M-type	S
TFDB	Singletons200786	Ath031591	M-type	E, G, S
TFDB	Singletons222729	Ath031591	M-type	E, G
TFDB	1128	Osj003402	MYB	E, G, S		AtMYB114 homologue
TFDB	1591	Osj056940	MYB	E, G, S
TFDB	1637	Ath019441	MYB	E, G, S		AtMYB90/PAP2 homologue
TFDB	1852	Osj049424	MYB	E, G, S	S	AtMYB75/PAP1 homologue
TFDB	1856	Osj014476	MYB	E, G, S
TFDB	2308	Ath018565	MYB	E, G, S
TFDB	2578	Ath014638	MYB	E, G, S
TFDB	3977	Ath019609	MYB	E, G, S
TFDB	4329	Ath018565	MYB	G, S
TFDB	5331	Ath009861	MYB	E, G, S
TFDB	GZ44Y0R01A2OSA	Ath023641	MYB	S		MYB30 homologue
TFDB	GZ44Y0R01A3Q0Y	Osj055873	MYB	G
TFDB	GZ44Y0R01A5BFA	Ath030519	MYB	S
TFDB	GZ44Y0R01AEPB2	Osj052399	MYB	S
TFDB	GZ44Y0R01B0FLO	Ath021520	MYB	S
TFDB	GZ44Y0R01B3KI1	Ath014638	MYB	S
TFDB	GZ44Y0R01BA8OV	Osj009599	MYB	S
TFDB	GZ44Y0R01BJOQI	Ath018565	MYB	G
TFDB	GZ44Y0R01BLO60	Osj048089	MYB	E
TFDB	GZ44Y0R01CCS38	Ath019606	MYB	E
TFDB	GZ44Y0R01CENEG	Osj020557	MYB	S
TFDB	GZ44Y0R01CO0RM	Osj020557	MYB	E
TFDB	GZ44Y0R01COTVQ	Osj010323	MYB	G
TFDB	GZ44Y0R01CUKYS	Osj023204	MYB	G
TFDB	GZ44Y0R01D7BJL	Ath018056	MYB	G
TFDB	GZ44Y0R01DB8QZ	Osj009599	MYB	S
TFDB	GZ44Y0R01DKNLL	Ath020225	MYB	G
TFDB	GZ44Y0R01DPCPK	Ath014638	MYB	G
TFDB	GZ44Y0R01ED4RV	Osj024825	MYB	S
TFDB	GZ44Y0R02F5VCJ	Osj055975	MYB	S
TFDB	GZ44Y0R02F64D2	Osj043567	MYB	G		MIXTA homologue
TFDB	GZ44Y0R02FOL0V	Ath018565	MYB	E
TFDB	GZ44Y0R02FP1FH	Ath019441	MYB	S		MYB30 homologue
TFDB	GZ44Y0R02FWHR2	Ath017874	MYB	E
TFDB	GZ44Y0R02G453K	Ath029552	MYB	G
TFDB	GZ44Y0R02G5QFI	Ath019606	MYB	E
TFDB	GZ44Y0R02GBXUE	Osj030234	MYB	E
TFDB	GZ44Y0R02GYJF6	Osj032127	MYB	S
TFDB	GZ44Y0R02H11A7	Osj019148	MYB	E
TFDB	GZ44Y0R02H7NRS	Ath017874	MYB	S
TFDB	GZ44Y0R02H7V9G	Osj038039	MYB	S
TFDB	GZ44Y0R02HJHM8	Osj038039	MYB	S
TFDB	GZ44Y0R02HK1U3	Osj052399	MYB	G
TFDB	GZ44Y0R02HMAUJ	Ath010808	MYB	E
TFDB	GZ44Y0R02HVFV4	Osj029730	MYB	S
TFDB	GZ44Y0R02I031M	Ath012050	MYB	S		AtMYB113 homologue
TFDB	GZ44Y0R02I165A	Osj024825	MYB	G
TFDB	GZ44Y0R02I4XSE	Ath018565	MYB	S
TFDB	GZ44Y0R02I7PRQ	Osj038956	MYB	S
TFDB	GZ44Y0R02I831B	Ath017874	MYB	G
TFDB	GZ44Y0R02ITQNJ	Ath011090	MYB	S	S	MIXTA homologue
TFDB	GZ44Y0R02IY9V0	Ath009650	MYB	S
TFDB	GZ44Y0R02JCC94	Ath016451	MYB	E
TFDB	newbler-isotig01088	Osj032127	MYB	E, G, S
TFDB	newbler-isotig01089	Osj015308	MYB	E, G, S
TFDB	newbler-isotig02399	Osj056940	MYB	E, G, S
TFDB	newbler-isotig02400	Osj056940	MYB	E, G, S
TFDB	newbler-isotig08477	Osj025102	MYB	G, S
TFDB	Singletons10160	Osj038657	MYB	S
TFDB	Singletons10285	Osj027615	MYB	S
TFDB	Singletons11567	Ath030519	MYB	E, G
TFDB	Singletons12777	Osj036576	MYB	S
TFDB	Singletons12790	Ath017874	MYB	E, G, S
TFDB	Singletons13447	Osj055975	MYB	E, G, S
TFDB	Singletons14200	Ath018565	MYB	S
TFDB	Singletons207628	Osj010323	MYB	S
TFDB	Singletons208287	Ath019606	MYB	E, S
TFDB	Singletons209621	Ath018565	MYB	S
TFDB	Singletons212954	Osj024825	MYB	G, S
TFDB	Singletons216413	Osj010323	MYB	S
TFDB	Singletons218458	Osj056940	MYB	S
TFDB	Singletons220879	Ath016522	MYB	S
TFDB	Singletons221822	Ath010808	MYB	E
TFDB	Singletons222452	Osj031667	MYB	S
TFDB	Singletons223718	Ath018565	MYB	S
TFDB	Singletons223911	Ath022073	MYB	S
TFDB	Singletons224223	Ath027900	MYB	E
TFDB	Singletons226002	Osj013979	MYB	S
TFDB	Singletons227726	Osj055975	MYB	S
TFDB	Singletons228249	Ath018565	MYB	S
TFDB	Singletons229829	Osj025296	MYB	S
TFDB	Singletons230267	Osj045261	MYB	S		MIXTA homologue
TFDB	Singletons230647	Osj003843	MYB	S
TFDB	Singletons231418	Ath031214	MYB	S
TFDB	Singletons233000	Ath029552	MYB	G, S
TFDB	Singletons233084	Osj033681	MYB	S
TFDB	Singletons234744	Ath018565	MYB	S
TFDB	Singletons235394	Osj019148	MYB	E
TFDB	Singletons236905	Ath003594	MYB	G, S
TFDB	Singletons237168	Ath018565	MYB	E, S
TFDB	Singletons2499	Ath010112	MYB	G, S
TFDB	Singletons2782	Ath024336	MYB	S
TFDB	Singletons4145	Osj055873	MYB	G, S
TFDB	Singletons4689	Ath018112	MYB	G, S
TFDB	Singletons5549	Ath014638	MYB	G, S
TFDB	Singletons7164	Ath009280	MYB	S
TFDB	Singletons8512	Ath002567	MYB	S
TFDB	Singletons9739	Ath020225	MYB	G, S
TFDB	Singletons9942	Ath016451	MYB	E
TFDB	1041	Osj042497	MYB_related	E, G, S
TFDB	2593	Osj048082	MYB_related	E, G, S
TFDB	2763	Osj007078	MYB_related	E, G, S
TFDB	2782	Ath028434	MYB_related	E, G, S
TFDB	3829	Ath028243	MYB_related	E, G, S	E
TFDB	4606	Ath019263	MYB_related	G, S
TFDB	4836	Ath028434	MYB_related	E, G, S
TFDB	4897	Osj026179	MYB_related	E, G, S
TFDB	GZ44Y0R01A1N8Y	Osj042497	MYB_related	S
TFDB	GZ44Y0R01AUMBZ	Ath006039	MYB_related	G
TFDB	GZ44Y0R01AWX0N	Ath025553	MYB_related	E
TFDB	GZ44Y0R01B1ZKF	Ath030039	MYB_related	G
TFDB	GZ44Y0R01BKW4I	Ath006039	MYB_related	S
TFDB	GZ44Y0R01BMVS1	Osj051863	MYB_related	S
TFDB	GZ44Y0R01CDPKU	Osj015082	MYB_related	S
TFDB	GZ44Y0R01CEMEK	Ath012258	MYB_related	G
TFDB	GZ44Y0R01D6ADF	Osj047798	MYB_related	E
TFDB	GZ44Y0R01E2JER	Ath028434	MYB_related	G
TFDB	GZ44Y0R01EH1O0	Osj022134	MYB_related	E
TFDB	GZ44Y0R02F7NBG	Ath023642	MYB_related	E
TFDB	GZ44Y0R02F94AS	Ath021159	MYB_related	S
TFDB	GZ44Y0R02FJ4DK	Osj015082	MYB_related	S
TFDB	GZ44Y0R02FJH8F	Ath025553	MYB_related	S
TFDB	GZ44Y0R02FPZQS	Osj012854	MYB_related	G
TFDB	GZ44Y0R02GSPTA	Osj046473	MYB_related	G
TFDB	GZ44Y0R02HDUX2	Ath030039	MYB_related	E
TFDB	GZ44Y0R02HIOLK	Ath022153	MYB_related	G
TFDB	GZ44Y0R02HP0WS	Osj039517	MYB_related	S
TFDB	GZ44Y0R02I0I0V	Ath012258	MYB_related	S
TFDB	GZ44Y0R02IF8IG	Ath030039	MYB_related	G
TFDB	GZ44Y0R02INIX2	Ath007752	MYB_related	S
TFDB	GZ44Y0R02IXAHI	Ath010478	MYB_related	G
TFDB	newbler-isotig00300	Ath028733	MYB_related	E, G, S
TFDB	newbler-isotig00301	Osj044013	MYB_related	E, G, S
TFDB	newbler-isotig00302	Ath028733	MYB_related	E, G, S
TFDB	newbler-isotig08185	Osj005971	MYB_related	E, G, S
TFDB	Singletons10879	Osj046473	MYB_related	S
TFDB	Singletons11663	Osj051863	MYB_related	S
TFDB	Singletons11941	Osj058011	MYB_related	S
TFDB	Singletons12260	Osj043960	MYB_related	E, S
TFDB	Singletons13054	Osj056769	MYB_related	S
TFDB	Singletons13126	Osj042756	MYB_related	G, S
TFDB	Singletons13462	Osj015082	MYB_related	S
TFDB	Singletons14208	Osj017579	MYB_related
TFDB	Singletons14388	Osj039555	MYB_related	S
TFDB	Singletons15155	Ath005410	MYB_related	S
TFDB	Singletons15170	Osj000458	MYB_related	E
TFDB	Singletons201975	Osj012854	MYB_related	G
TFDB	Singletons205686	Osj058011	MYB_related	S
TFDB	Singletons209182	Osj007078	MYB_related	S
TFDB	Singletons209632	Osj047036	MYB_related	G, S
TFDB	Singletons210165	Osj025100	MYB_related	S
TFDB	Singletons210270	Osj047798	MYB_related	S
TFDB	Singletons210743	Ath025319	MYB_related	S
TFDB	Singletons214178	Ath025553	MYB_related	E, G
TFDB	Singletons215839	Ath010478	MYB_related	S
TFDB	Singletons215875	Ath004600	MYB_related	S
TFDB	Singletons216128	Osj038857	MYB_related	S
TFDB	Singletons216630	Ath010478	MYB_related	G
TFDB	Singletons218865	Osj043141	MYB_related	E
TFDB	Singletons219976	Osj019540	MYB_related	S
TFDB	Singletons220809	Ath021159	MYB_related	S
TFDB	Singletons221696	Ath030039	MYB_related	G
TFDB	Singletons223329	Ath030039	MYB_related	S
TFDB	Singletons224199	Osj034301	MYB_related	S
TFDB	Singletons224309	Ath007801	MYB_related	S
TFDB	Singletons224999	Osj034301	MYB_related	S
TFDB	Singletons225230	Ath021159	MYB_related	G
TFDB	Singletons225425	Ath012512	MYB_related	G, S
TFDB	Singletons225942	Osj042756	MYB_related	S
TFDB	Singletons226062	Ath025319	MYB_related	S
TFDB	Singletons226980	Osj056769	MYB_related	S
TFDB	Singletons229778	Osj018346	MYB_related	E
TFDB	Singletons230590	Osj056769	MYB_related	E, G, S
TFDB	Singletons231224	Osj047798	MYB_related	G, S
TFDB	Singletons231239	Ath022096	MYB_related	S
TFDB	Singletons231869	Ath021159	MYB_related	S
TFDB	Singletons232987	Ath030039	MYB_related	G
TFDB	Singletons233037	Ath021159	MYB_related	S
TFDB	Singletons233053	Osj009169	MYB_related	G
TFDB	Singletons233911	Osj019540	MYB_related	S
TFDB	Singletons234489	Osj033474	MYB_related	S
TFDB	Singletons235815	Osj039555	MYB_related	S
TFDB	Singletons236190	Ath021159	MYB_related	S
TFDB	Singletons236954	Osj051863	MYB_related	S
TFDB	Singletons237606	Osj039555	MYB_related	E, G
TFDB	Singletons237892	Osj033474	MYB_related	G, S
TFDB	Singletons2896	Ath007282	MYB_related	G, S
TFDB	Singletons3011	Osj030874	MYB_related	E
TFDB	Singletons3542	Osj033474	MYB_related	E
TFDB	Singletons4473	Osj042756	MYB_related	S
TFDB	Singletons5154	Osj046473	MYB_related	G
TFDB	Singletons6987	Ath021159	MYB_related	S
TFDB	Singletons7724	Ath028434	MYB_related	G
TFDB	Singletons9953	Osj012854	MYB_related	S
TFDB	1018	Osj039386	NAC	E, G, S
TFDB	1377	Osj004830	NAC	E, G, S
TFDB	1414	Ath025355	NAC	E, G, S
TFDB	2550	Ath008809	NAC	E, G, S
TFDB	3071	Osj043934	NAC	G, S
TFDB	3454	Osj038228	NAC	E, G, S	E, G, S*
TFDB	4239	Ath008809	NAC	G, S
TFDB	4650	Osj022084	NAC	E, G, S
TFDB	4880	Ath011298	NAC	G, S
TFDB	5176	Osj019000	NAC	G, S
TFDB	5327	Ath008809	NAC	G, S
TFDB	5366	Ath008809	NAC	E, G, S
TFDB	5386	Ath008809	NAC	E, G, S
TFDB	GZ44Y0R01A618V	Ath008809	NAC	E
TFDB	GZ44Y0R01A96CB	Ath014559	NAC	G
TFDB	GZ44Y0R01AECT4	Osj026571	NAC	G
TFDB	GZ44Y0R01AJYRG	Ath000333	NAC	S
TFDB	GZ44Y0R01B0F3C	Ath010071	NAC	E
TFDB	GZ44Y0R01B7TVF	Ath010071	NAC	G
TFDB	GZ44Y0R01BAEUL	Osj028747	NAC	S
TFDB	GZ44Y0R01BGP3V	Osj018932	NAC	S
TFDB	GZ44Y0R01BHJYS	Ath021988	NAC	S
TFDB	GZ44Y0R01BHMHH	Ath014559	NAC	G
TFDB	GZ44Y0R01BTGA8	Ath008809	NAC	S
TFDB	GZ44Y0R01BWAAK	Ath008809	NAC	G
TFDB	GZ44Y0R01C0BL4	Ath008809	NAC	G
TFDB	GZ44Y0R01C155I	Ath008809	NAC	E
TFDB	GZ44Y0R01C162X	Ath030836	NAC	S
TFDB	GZ44Y0R01C3O3M	Ath009976	NAC	S
TFDB	GZ44Y0R01C5B8W	Ath008809	NAC	E
TFDB	GZ44Y0R01C5LN6	Osj026571	NAC	S
TFDB	GZ44Y0R01C6V4B	Ath008809	NAC	G
TFDB	GZ44Y0R01CAS40	Ath008809	NAC	G
TFDB	GZ44Y0R01CMVVZ	Osj018932	NAC	G
TFDB	GZ44Y0R01CR6HQ	Osj026571	NAC	S
TFDB	GZ44Y0R01CRGP1	Osj057639	NAC	G
TFDB	GZ44Y0R01CRZQ9	Osj052882	NAC	G
TFDB	GZ44Y0R01CSMT2	Ath008809	NAC	G
TFDB	GZ44Y0R01D61OY	Ath010071	NAC	S
TFDB	GZ44Y0R01D76T9	Ath008809	NAC	G
TFDB	GZ44Y0R01DNH58	Ath008809	NAC	E
TFDB	GZ44Y0R01DWI7V	Osj034062	NAC	S
TFDB	GZ44Y0R01ED1XZ	Osj026231	NAC	S
TFDB	GZ44Y0R01EHSOG	Ath008809	NAC	G
TFDB	GZ44Y0R01EO4UH	Ath022246	NAC	G
TFDB	GZ44Y0R01ERFNB	Ath008809	NAC	G
TFDB	GZ44Y0R01EUJSB	Ath008809	NAC	S
TFDB	GZ44Y0R02F3LH5	Ath008809	NAC	G
TFDB	GZ44Y0R02F4D4Q	Ath008809	NAC	E
TFDB	GZ44Y0R02F8UXA	Ath008809	NAC	G
TFDB	GZ44Y0R02FLMEP	Ath008809	NAC	E
TFDB	GZ44Y0R02FMHYL	Ath008809	NAC	E
TFDB	GZ44Y0R02FP0V4	Ath008809	NAC	S
TFDB	GZ44Y0R02FUEDH	Ath028784	NAC	S
TFDB	GZ44Y0R02FX8ZN	Osj005254	NAC	G
TFDB	GZ44Y0R02G4D1A	Osj026231	NAC	G
TFDB	GZ44Y0R02G9ID8	Osj047140	NAC	S
TFDB	GZ44Y0R02GC9W3	Osj038228	NAC	E
TFDB	GZ44Y0R02GXU7G	Ath008809	NAC	G
TFDB	GZ44Y0R02GZHG6	Ath008809	NAC	S
TFDB	GZ44Y0R02HCCEC	Ath008809	NAC	S
TFDB	GZ44Y0R02I1OMP	Ath008809	NAC	E
TFDB	GZ44Y0R02IM655	Ath008809	NAC	S
TFDB	GZ44Y0R02IMCI0	Ath008809	NAC	E
TFDB	GZ44Y0R02J0WQS	Ath008809	NAC	G
TFDB	GZ44Y0R02JQ1R4	Ath008809	NAC	S
TFDB	GZ44Y0R02JR56R	Ath006339	NAC	G
TFDB	GZ44Y0R02JXWJ8	Osj052882	NAC	S
TFDB	GZ44Y0R02JZZ49	Ath030709	NAC	S
TFDB	newbler-isotig03095	Ath025484	NAC	E, G, S
TFDB	newbler-isotig03675	Osj039386	NAC	E, G, S
TFDB	newbler-isotig03735	Ath021731	NAC	E, G, S
TFDB	newbler-isotig04664	Ath008809	NAC	E, G
TFDB	Singletons10596	Osj041474	NAC	E
TFDB	Singletons11437	Osj005254	NAC	G
TFDB	Singletons11709	Ath008809	NAC	E
TFDB	Singletons11793	Ath008809	NAC	S
TFDB	Singletons12237	Ath008809	NAC	G
TFDB	Singletons12645	Ath008809	NAC	S
TFDB	Singletons12881	Ath008809	NAC	S
TFDB	Singletons13236	Ath007609	NAC	E, G, S
TFDB	Singletons13461	Osj033711	NAC	S
TFDB	Singletons13773	Ath008809	NAC	S
TFDB	Singletons13856	Ath008809	NAC	S
TFDB	Singletons14384	Ath008809	NAC	E, G, S
TFDB	Singletons1442	Ath008809	NAC	S
TFDB	Singletons14520	Ath008809	NAC	G
TFDB	Singletons14800	Osj046702	NAC	S
TFDB	Singletons15020	Ath008809	NAC	S
TFDB	Singletons15237	Ath008809	NAC	S
TFDB	Singletons15393	Osj034062	NAC	E, G, S
TFDB	Singletons15423	Ath008809	NAC	E, G, S
TFDB	Singletons1933	Ath008809	NAC	G
TFDB	Singletons201636	Ath008809	NAC	S
TFDB	Singletons202687	Ath031784	NAC	S
TFDB	Singletons202935	Osj035137	NAC	S
TFDB	Singletons204728	Ath008809	NAC	S
TFDB	Singletons204770	Ath008809	NAC	S
TFDB	Singletons204946	Ath008809	NAC	E
TFDB	Singletons204957	Ath008809	NAC	S
TFDB	Singletons2053	Osj046702	NAC	S
TFDB	Singletons205341	Ath008809	NAC	S
TFDB	Singletons206050	Ath008809	NAC	S
TFDB	Singletons206834	Ath008809	NAC	S
TFDB	Singletons206866	Ath008809	NAC	G
TFDB	Singletons207038	Ath008809	NAC	S
TFDB	Singletons207726	Ath008809	NAC	S
TFDB	Singletons207852	Ath008809	NAC	S
TFDB	Singletons208035	Osj022937	NAC	G, S
TFDB	Singletons210171	Osj047659	NAC	S
TFDB	Singletons210193	Osj033711	NAC	S
TFDB	Singletons211323	Osj034062	NAC	S
TFDB	Singletons211469	Ath008809	NAC	S
TFDB	Singletons211580	Ath008809	NAC	G
TFDB	Singletons211582	Ath008809	NAC	S
TFDB	Singletons211609	Ath008809	NAC	S
TFDB	Singletons211714	Ath008809	NAC	S
TFDB	Singletons211780	Ath008809	NAC	S
TFDB	Singletons211986	Ath008809	NAC	G
TFDB	Singletons212814	Ath008809	NAC	S
TFDB	Singletons213547	Ath008809	NAC	S
TFDB	Singletons214129	Ath008809	NAC	S
TFDB	Singletons214772	Ath008809	NAC	S
TFDB	Singletons215121	Ath008809	NAC	S
TFDB	Singletons215626	Osj020391	NAC	S
TFDB	Singletons217536	Ath008809	NAC	S
TFDB	Singletons218977	Ath008809	NAC	S
TFDB	Singletons219534	Ath008809	NAC	E, G
TFDB	Singletons219924	Ath008809	NAC	S
TFDB	Singletons220961	Ath008809	NAC	S
TFDB	Singletons221148	Ath008809	NAC	S
TFDB	Singletons221338	Osj029117	NAC	G
TFDB	Singletons221359	Ath008809	NAC	E
TFDB	Singletons221370	Ath008809	NAC	S
TFDB	Singletons221977	Ath008809	NAC	S
TFDB	Singletons222796	Ath015803	NAC	G
TFDB	Singletons223014	Ath008809	NAC	E, G, S
TFDB	Singletons223015	Ath031905	NAC	S
TFDB	Singletons223029	Ath008809	NAC	S
TFDB	Singletons223236	Osj005483	NAC	S
TFDB	Singletons223390	Ath008809	NAC	S
TFDB	Singletons223941	Ath008809	NAC	S
TFDB	Singletons223979	Ath008809	NAC	S
TFDB	Singletons224110	Ath008809	NAC	S
TFDB	Singletons224239	Ath008809	NAC	S
TFDB	Singletons224738	Ath008809	NAC	S
TFDB	Singletons224765	Ath008809	NAC	E
TFDB	Singletons224776	Ath008809	NAC	G
TFDB	Singletons225005	Ath025355	NAC	S
TFDB	Singletons225105	Ath008809	NAC	S
TFDB	Singletons225216	Ath008809	NAC	S
TFDB	Singletons225389	Ath008809	NAC	S
TFDB	Singletons225731	Ath008809	NAC	S
TFDB	Singletons225948	Osj043934	NAC	S
TFDB	Singletons226259	Ath008809	NAC	E
TFDB	Singletons226283	Ath008809	NAC	S
TFDB	Singletons226711	Ath008809	NAC	S
TFDB	Singletons226822	Osj046702	NAC	S
TFDB	Singletons227061	Osj052882	NAC	G, S
TFDB	Singletons227590	Ath008809	NAC	G, S
TFDB	Singletons228310	Ath008809	NAC	S
TFDB	Singletons228336	Ath008809	NAC	S
TFDB	Singletons228340	Ath008809	NAC	S
TFDB	Singletons228928	Ath008809	NAC	S
TFDB	Singletons229194	Ath008809	NAC	S
TFDB	Singletons229251	Ath008809	NAC	S
TFDB	Singletons229754	Ath008809	NAC	S
TFDB	Singletons229883	Ath008809	NAC	S
TFDB	Singletons229930	Ath008809	NAC	S
TFDB	Singletons230268	Ath008809	NAC	S
TFDB	Singletons230269	Osj028747	NAC	S
TFDB	Singletons230629	Ath008809	NAC	G, S
TFDB	Singletons230782	Ath008809	NAC	S
TFDB	Singletons230824	Ath008809	NAC	S
TFDB	Singletons230891	Ath008809	NAC	S
TFDB	Singletons231	Osj005254	NAC	G
TFDB	Singletons231033	Osj043934	NAC	S
TFDB	Singletons231132	Ath008809	NAC	S
TFDB	Singletons231325	Ath008809	NAC	S
TFDB	Singletons231384	Osj035137	NAC	S
TFDB	Singletons231410	Ath008809	NAC	S
TFDB	Singletons231504	Ath008809	NAC	S
TFDB	Singletons231742	Ath008809	NAC	S
TFDB	Singletons231797	Ath008809	NAC	S
TFDB	Singletons232009	Ath008809	NAC	S
TFDB	Singletons232152	Ath008809	NAC	G
TFDB	Singletons232334	Ath008809	NAC	S
TFDB	Singletons232372	Ath008809	NAC	S
TFDB	Singletons232442	Ath008809	NAC	G, S
TFDB	Singletons232547	Ath008809	NAC	S
TFDB	Singletons232587	Ath008809	NAC	S
TFDB	Singletons232637	Ath008809	NAC	E
TFDB	Singletons232860	Ath008809	NAC	S
TFDB	Singletons233141	Ath008809	NAC	S
TFDB	Singletons233465	Ath020851	NAC	G
TFDB	Singletons233514	Ath008809	NAC	E, S
TFDB	Singletons233713	Ath008809	NAC	S
TFDB	Singletons234125	Ath008809	NAC	S
TFDB	Singletons234196	Ath008809	NAC	G
TFDB	Singletons234349	Ath028784	NAC	S
TFDB	Singletons234580	Ath008809	NAC	S
TFDB	Singletons234595	Ath008809	NAC	S
TFDB	Singletons235348	Ath008809	NAC	S
TFDB	Singletons235472	Ath008809	NAC	S
TFDB	Singletons235558	Ath008809	NAC	E, S
TFDB	Singletons235603	Ath008809	NAC	G, S
TFDB	Singletons235648	Ath008809	NAC	G
TFDB	Singletons235720	Ath008809	NAC	E, G
TFDB	Singletons235812	Ath008809	NAC	S
TFDB	Singletons235965	Ath008809	NAC	G, S
TFDB	Singletons236030	Ath008809	NAC	E, G
TFDB	Singletons236182	Ath008809	NAC	E, G, S
TFDB	Singletons236188	Ath008809	NAC	S
TFDB	Singletons236208	Ath008809	NAC	E, G, S
TFDB	Singletons236209	Ath008809	NAC	E, G, S
TFDB	Singletons236278	Ath008809	NAC	S
TFDB	Singletons236464	Ath008809	NAC	S
TFDB	Singletons236550	Ath008809	NAC	E, S
TFDB	Singletons236798	Ath008809	NAC	E, S
TFDB	Singletons236983	Ath008809	NAC	S
TFDB	Singletons237120	Ath008809	NAC	G
TFDB	Singletons237206	Ath008809	NAC	S
TFDB	Singletons237356	Ath008809	NAC	S
TFDB	Singletons237366	Ath008809	NAC	S
TFDB	Singletons237458	Ath008809	NAC	S
TFDB	Singletons237490	Ath008809	NAC	E, S
TFDB	Singletons237708	Osj030502	NAC	G
TFDB	Singletons237743	Ath008809	NAC	S
TFDB	Singletons237855	Osj026571	NAC	G, S
TFDB	Singletons238091	Ath008809	NAC	E, S
TFDB	Singletons238167	Ath008809	NAC	E, G, S
TFDB	Singletons3297	Ath008809	NAC	E, S
TFDB	Singletons3503	Ath008809	NAC	S
TFDB	Singletons3894	Ath008809	NAC	S
TFDB	Singletons4203	Ath008809	NAC	S
TFDB	Singletons5284	Ath008809	NAC	S
TFDB	Singletons6651	Ath008809	NAC	S
TFDB	Singletons7264	Ath008809	NAC	S
TFDB	Singletons7301	Ath009976	NAC	S
TFDB	Singletons8003	Ath008809	NAC	G, S
TFDB	Singletons8391	Ath008809	NAC	G, S
TFDB	Singletons8781	Ath008809	NAC	S
TFDB	Singletons8897	Ath008809	NAC	S
TFDB	Singletons9150	Ath008809	NAC	S
TFDB	Singletons9279	Ath008809	NAC	S
TFDB	Singletons9470	Ath008809	NAC	S
TFDB	Singletons9509	Ath008809	NAC	S
TFDB	Singletons9569	Ath008809	NAC	S
TFDB	Singletons9913	Osj035137	NAC	S
TFDB	3538	Osj002326	NF-X1	G, S
TFDB	GZ44Y0R01DIO5Y	Osj002326	NF-X1	S
TFDB	GZ44Y0R02IFJ8Z	Osj005850	NF-X1	G
TFDB	Singletons12140	Osj005850	NF-X1	G
TFDB	Singletons206319	Osj002326	NF-X1	S
TFDB	Singletons225871	Ath021347	NF-X1	G
TFDB	Singletons226458	Osj002326	NF-X1	S
TFDB	Singletons227534	Osj002326	NF-X1	S
TFDB	Singletons233519	Osj002326	NF-X1	S
TFDB	Singletons4796	Ath021347	NF-X1	E, G, S
TFDB	2132	Osj018533	NF-YA	E, G, S
TFDB	GZ44Y0R01A0DMX	Osj050499	NF-YA	G
TFDB	GZ44Y0R01A2O7X	Osj050499	NF-YA	E
TFDB	GZ44Y0R01A742S	Osj050499	NF-YA	G
TFDB	GZ44Y0R01A7K8Z	Osj050499	NF-YA	E
TFDB	GZ44Y0R01A9K3L	Osj050499	NF-YA	S
TFDB	GZ44Y0R01ACLWD	Osj050499	NF-YA	G
TFDB	GZ44Y0R01AGKOT	Osj050499	NF-YA	S
TFDB	GZ44Y0R01AJWC6	Osj050499	NF-YA	G
TFDB	GZ44Y0R01AOHO0	Osj050499	NF-YA	G
TFDB	GZ44Y0R01AQAPK	Osj050499	NF-YA	E
TFDB	GZ44Y0R01AUU9D	Osj050499	NF-YA	S
TFDB	GZ44Y0R01AUVXD	Osj050499	NF-YA	S
TFDB	GZ44Y0R01AWF93	Osj050499	NF-YA	S
TFDB	GZ44Y0R01AY1VJ	Osj050499	NF-YA	G
TFDB	GZ44Y0R01B0ZX0	Osj050499	NF-YA	S
TFDB	GZ44Y0R01B15AU	Osj050499	NF-YA	S
TFDB	GZ44Y0R01B2XDE	Osj050499	NF-YA	G
TFDB	GZ44Y0R01B5C0U	Osj050499	NF-YA	G
TFDB	GZ44Y0R01B6916	Osj050499	NF-YA	E
TFDB	GZ44Y0R01B70ZR	Osj050499	NF-YA	S
TFDB	GZ44Y0R01B8AGN	Osj050499	NF-YA	S
TFDB	GZ44Y0R01BAAKD	Osj050499	NF-YA	E
TFDB	GZ44Y0R01BBMPN	Osj050499	NF-YA	S
TFDB	GZ44Y0R01BFKXJ	Osj050499	NF-YA	E
TFDB	GZ44Y0R01BGONR	Osj050499	NF-YA	G
TFDB	GZ44Y0R01BN377	Osj050499	NF-YA	S
TFDB	GZ44Y0R01BOF9A	Osj050499	NF-YA	E
TFDB	GZ44Y0R01BSDYZ	Osj050499	NF-YA	G
TFDB	GZ44Y0R01BSYV4	Osj050499	NF-YA	G
TFDB	GZ44Y0R01BYDYN	Osj050499	NF-YA	G
TFDB	GZ44Y0R01BZLB8	Osj050499	NF-YA	S
TFDB	GZ44Y0R01C0NRL	Osj050499	NF-YA	S
TFDB	GZ44Y0R01C22NQ	Osj050499	NF-YA	S
TFDB	GZ44Y0R01C27LF	Osj050499	NF-YA	S
TFDB	GZ44Y0R01C2H3Q	Osj050499	NF-YA	S
TFDB	GZ44Y0R01C47PA	Osj050499	NF-YA	G
TFDB	GZ44Y0R01C5UEC	Osj050499	NF-YA	S
TFDB	GZ44Y0R01C76Z1	Osj050499	NF-YA	E
TFDB	GZ44Y0R01C99JG	Osj050499	NF-YA	S
TFDB	GZ44Y0R01C9WEQ	Osj050499	NF-YA	G
TFDB	GZ44Y0R01CBI03	Osj050499	NF-YA	G
TFDB	GZ44Y0R01CDZ3R	Osj050499	NF-YA	S
TFDB	GZ44Y0R01CEBYR	Osj050499	NF-YA	E
TFDB	GZ44Y0R01CGV2D	Osj050499	NF-YA	S
TFDB	GZ44Y0R01CHZV8	Osj050499	NF-YA	G
TFDB	GZ44Y0R01CKYW4	Osj031975	NF-YA	S
TFDB	GZ44Y0R01CLCV0	Osj050499	NF-YA	G
TFDB	GZ44Y0R01CLJKZ	Osj050499	NF-YA	E
TFDB	GZ44Y0R01CMI0G	Osj050499	NF-YA	G
TFDB	GZ44Y0R01CR7BS	Osj050499	NF-YA	E
TFDB	GZ44Y0R01CSMR1	Osj050499	NF-YA	E
TFDB	GZ44Y0R01CVCDH	Osj050499	NF-YA	E
TFDB	GZ44Y0R01CWL4N	Osj050499	NF-YA	G
TFDB	GZ44Y0R01CWMNK	Osj050499	NF-YA	G
TFDB	GZ44Y0R01CWV92	Osj050499	NF-YA	E
TFDB	GZ44Y0R01CWWU8	Osj050499	NF-YA	E
TFDB	GZ44Y0R01CXFQJ	Osj050499	NF-YA	E
TFDB	GZ44Y0R01CY5YL	Osj050499	NF-YA	S
TFDB	GZ44Y0R01CZP45	Osj050499	NF-YA	G
TFDB	GZ44Y0R01D0LA1	Osj050499	NF-YA	E
TFDB	GZ44Y0R01D0S5D	Osj050499	NF-YA	E
TFDB	GZ44Y0R01D86A3	Osj050499	NF-YA	G
TFDB	GZ44Y0R01D9JWX	Osj050499	NF-YA	S
TFDB	GZ44Y0R01D9OVP	Osj050499	NF-YA	S
TFDB	GZ44Y0R01DAJ29	Osj050499	NF-YA	E
TFDB	GZ44Y0R01DANVK	Osj050499	NF-YA	E
TFDB	GZ44Y0R01DC1DQ	Osj050499	NF-YA	G
TFDB	GZ44Y0R01DCS4J	Osj050499	NF-YA	G
TFDB	GZ44Y0R01DJC44	Osj050499	NF-YA	E
TFDB	GZ44Y0R01DJJ4V	Osj050499	NF-YA	E
TFDB	GZ44Y0R01DMLND	Osj050499	NF-YA	S
TFDB	GZ44Y0R01DSGRB	Osj050499	NF-YA	E
TFDB	GZ44Y0R01DTJ4Q	Osj050499	NF-YA	S
TFDB	GZ44Y0R01DUECI	Osj050499	NF-YA	S
TFDB	GZ44Y0R01DWNM9	Osj050499	NF-YA	S
TFDB	GZ44Y0R01DXIIE	Osj050499	NF-YA	S
TFDB	GZ44Y0R01E1HN1	Osj050499	NF-YA	G
TFDB	GZ44Y0R01EA3RX	Osj050499	NF-YA	G
TFDB	GZ44Y0R01EAFGK	Osj050499	NF-YA	G
TFDB	GZ44Y0R01EBRC3	Osj050499	NF-YA	S
TFDB	GZ44Y0R01ECTMK	Osj050499	NF-YA	S
TFDB	GZ44Y0R01EJLWJ	Osj050499	NF-YA	E
TFDB	GZ44Y0R01EKM1M	Osj050499	NF-YA	E
TFDB	GZ44Y0R01ENF3O	Osj050499	NF-YA	E
TFDB	GZ44Y0R01EQ762	Osj050499	NF-YA	S
TFDB	GZ44Y0R01ERT2K	Osj050499	NF-YA	S
TFDB	GZ44Y0R01ERXMK	Osj050499	NF-YA	G
TFDB	GZ44Y0R01ES5CE	Osj050499	NF-YA	E
TFDB	GZ44Y0R01EWPDV	Osj050499	NF-YA	S
TFDB	GZ44Y0R01EZG8F	Osj050499	NF-YA	G
TFDB	GZ44Y0R02F32HH	Osj050499	NF-YA	E
TFDB	GZ44Y0R02F344R	Osj050499	NF-YA	E
TFDB	GZ44Y0R02F39BW	Osj050499	NF-YA	E
TFDB	GZ44Y0R02F3GTX	Osj050499	NF-YA	S
TFDB	GZ44Y0R02F3LP4	Osj050499	NF-YA	E
TFDB	GZ44Y0R02F5GKX	Osj050499	NF-YA	E
TFDB	GZ44Y0R02F615O	Osj050499	NF-YA	S
TFDB	GZ44Y0R02F6JEL	Osj050499	NF-YA	G
TFDB	GZ44Y0R02F8OS7	Osj050499	NF-YA	E
TFDB	GZ44Y0R02FMSM6	Osj050499	NF-YA	G
TFDB	GZ44Y0R02FT8DW	Osj050499	NF-YA	G
TFDB	GZ44Y0R02FU5A0	Osj050499	NF-YA	S
TFDB	GZ44Y0R02FX54Y	Osj050499	NF-YA	G
TFDB	GZ44Y0R02FXJGB	Osj050499	NF-YA	S
TFDB	GZ44Y0R02FZGML	Osj050499	NF-YA	S
TFDB	GZ44Y0R02G1PLV	Osj050499	NF-YA	E
TFDB	GZ44Y0R02G2SWL	Osj050499	NF-YA	E
TFDB	GZ44Y0R02G9X6V	Osj050499	NF-YA	S
TFDB	GZ44Y0R02GAJC1	Osj050499	NF-YA	E
TFDB	GZ44Y0R02GB6UJ	Osj050499	NF-YA	E
TFDB	GZ44Y0R02GBF27	Osj050499	NF-YA	S
TFDB	GZ44Y0R02GBLTJ	Osj050499	NF-YA	S
TFDB	GZ44Y0R02GBOUQ	Osj050499	NF-YA	S
TFDB	GZ44Y0R02GE1WN	Osj050499	NF-YA	E
TFDB	GZ44Y0R02GFIV8	Osj050499	NF-YA	S
TFDB	GZ44Y0R02GOAKG	Osj050499	NF-YA	G
TFDB	GZ44Y0R02GP0S4	Osj050499	NF-YA	G
TFDB	GZ44Y0R02GRXHM	Osj050499	NF-YA	E
TFDB	GZ44Y0R02GTHC2	Osj050499	NF-YA	S
TFDB	GZ44Y0R02GW7VB	Osj050499	NF-YA	G
TFDB	GZ44Y0R02GX3BD	Osj050499	NF-YA	G
TFDB	GZ44Y0R02H1CIQ	Osj050499	NF-YA	S
TFDB	GZ44Y0R02H34BZ	Osj050499	NF-YA	G
TFDB	GZ44Y0R02H3H1Z	Osj050499	NF-YA	E
TFDB	GZ44Y0R02HA7LK	Osj050499	NF-YA	S
TFDB	GZ44Y0R02HAC7A	Osj050499	NF-YA	S
TFDB	GZ44Y0R02HG2R0	Osj050499	NF-YA	S
TFDB	GZ44Y0R02HO7W8	Osj050499	NF-YA	E
TFDB	GZ44Y0R02HQ7TN	Osj050499	NF-YA	E
TFDB	GZ44Y0R02HQAZ3	Osj050499	NF-YA	S
TFDB	GZ44Y0R02HRP3Q	Osj050499	NF-YA	S
TFDB	GZ44Y0R02HWA6Y	Osj050499	NF-YA	G
TFDB	GZ44Y0R02HXBSK	Osj050499	NF-YA	S
TFDB	GZ44Y0R02I18ZA	Osj050499	NF-YA	S
TFDB	GZ44Y0R02I4C2Z	Osj050499	NF-YA	G
TFDB	GZ44Y0R02I7ZUE	Osj050499	NF-YA	E
TFDB	GZ44Y0R02I828G	Osj050499	NF-YA	S
TFDB	GZ44Y0R02IATPA	Osj050499	NF-YA	G
TFDB	GZ44Y0R02ICUTC	Osj050499	NF-YA	G
TFDB	GZ44Y0R02IDNH3	Osj050499	NF-YA	S
TFDB	GZ44Y0R02IJV5H	Osj050499	NF-YA	E
TFDB	GZ44Y0R02INARC	Osj050499	NF-YA	S
TFDB	GZ44Y0R02INLXZ	Osj050499	NF-YA	S
TFDB	GZ44Y0R02IQ7AJ	Osj050499	NF-YA	G
TFDB	GZ44Y0R02IST1F	Osj050499	NF-YA	E
TFDB	GZ44Y0R02IYMIP	Osj050499	NF-YA	G
TFDB	GZ44Y0R02JADR9	Osj050499	NF-YA	E
TFDB	GZ44Y0R02JFZR0	Osj050499	NF-YA	E
TFDB	GZ44Y0R02JG0W1	Osj050499	NF-YA	S
TFDB	GZ44Y0R02JGTMO	Osj050499	NF-YA	S
TFDB	GZ44Y0R02JKJA4	Osj050499	NF-YA	S
TFDB	GZ44Y0R02JL1ZW	Osj050499	NF-YA	S
TFDB	GZ44Y0R02JMEY4	Osj050499	NF-YA	S
TFDB	GZ44Y0R02JNG2T	Osj050499	NF-YA	S
TFDB	GZ44Y0R02JO1FA	Osj050499	NF-YA	E
TFDB	GZ44Y0R02JP0GO	Osj050499	NF-YA	E
TFDB	GZ44Y0R02JP3E2	Osj050499	NF-YA	E
TFDB	GZ44Y0R02JXIK6	Osj050499	NF-YA	S
TFDB	GZ44Y0R02JYVHJ	Osj050499	NF-YA	S
TFDB	newbler-isotig00476	Osj050499	NF-YA	E, G, S
TFDB	newbler-isotig00477	Osj050499	NF-YA	G, S
TFDB	newbler-isotig01470	Osj050499	NF-YA	E, G, S
TFDB	newbler-isotig02019	Osj050499	NF-YA	G, S
TFDB	newbler-isotig04170	Osj050499	NF-YA	G
TFDB	newbler-isotig04436	Osj050499	NF-YA	E, G, S
TFDB	newbler-isotig04492	Osj050499	NF-YA	E, G, S
TFDB	newbler-isotig04638	Osj050499	NF-YA	E, G, S
TFDB	newbler-isotig05120	Osj050499	NF-YA	E, S
TFDB	newbler-isotig05433	Osj050499	NF-YA	E, G, S
TFDB	newbler-isotig05595	Osj050499	NF-YA	E, G, S
TFDB	newbler-isotig06042	Osj050499	NF-YA	E, G, S
TFDB	newbler-isotig06192	Osj050499	NF-YA	E, G, S
TFDB	newbler-isotig06574	Osj050499	NF-YA	E, G, S
TFDB	newbler-isotig06752	Osj050499	NF-YA	E, G, S
TFDB	newbler-isotig07115	Osj050499	NF-YA	E, G, S
TFDB	newbler-isotig07602	Osj050499	NF-YA	E, G, S
TFDB	newbler-isotig08497	Osj050499	NF-YA	E, G, S
TFDB	newbler-isotig08944	Osj050499	NF-YA	E, S
TFDB	Singletons10058	Osj050499	NF-YA	S
TFDB	Singletons1076	Osj050499	NF-YA	E, G
TFDB	Singletons10830	Osj050499	NF-YA	S
TFDB	Singletons10867	Osj050499	NF-YA	S
TFDB	Singletons11184	Osj050499	NF-YA	S
TFDB	Singletons11291	Osj050499	NF-YA	E
TFDB	Singletons11349	Osj050499	NF-YA	S
TFDB	Singletons11460	Osj050499	NF-YA	S
TFDB	Singletons11546	Osj050499	NF-YA	S
TFDB	Singletons11562	Osj050499	NF-YA	E
TFDB	Singletons11661	Osj050499	NF-YA	S
TFDB	Singletons11718	Osj050499	NF-YA	S
TFDB	Singletons11774	Osj050499	NF-YA	S
TFDB	Singletons11876	Osj050499	NF-YA	S
TFDB	Singletons11930	Osj050499	NF-YA	S
TFDB	Singletons12055	Osj050499	NF-YA	S
TFDB	Singletons12300	Osj050499	NF-YA	S
TFDB	Singletons12419	Osj050499	NF-YA	S
TFDB	Singletons1271	Osj050499	NF-YA	S
TFDB	Singletons13073	Osj050499	NF-YA	E
TFDB	Singletons13188	Osj050499	NF-YA	S
TFDB	Singletons13206	Osj050499	NF-YA	S
TFDB	Singletons13216	Osj050499	NF-YA	S
TFDB	Singletons13604	Osj050499	NF-YA	E, S
TFDB	Singletons13786	Osj050499	NF-YA	S
TFDB	Singletons14081	Osj050499	NF-YA	S
TFDB	Singletons14272	Osj050499	NF-YA	S
TFDB	Singletons14276	Osj050499	NF-YA	S
TFDB	Singletons14648	Osj050499	NF-YA	S
TFDB	Singletons14727	Osj050499	NF-YA	S
TFDB	Singletons15002	Osj050499	NF-YA	S
TFDB	Singletons15099	Osj050499	NF-YA	S
TFDB	Singletons151	Osj050499	NF-YA	S
TFDB	Singletons1672	Osj050499	NF-YA	S
TFDB	Singletons1686	Osj050499	NF-YA	S
TFDB	Singletons1695	Osj050499	NF-YA	S
TFDB	Singletons17	Osj050499	NF-YA	S
TFDB	Singletons1754	Osj050499	NF-YA	S
TFDB	Singletons1843	Osj050499	NF-YA	S
TFDB	Singletons200246	Osj050499	NF-YA	S
TFDB	Singletons200720	Osj050499	NF-YA	E
TFDB	Singletons200880	Osj050499	NF-YA	G
TFDB	Singletons201064	Osj050499	NF-YA	S
TFDB	Singletons201892	Osj050499	NF-YA	S
TFDB	Singletons202375	Osj050499	NF-YA	S
TFDB	Singletons203452	Osj050499	NF-YA	S
TFDB	Singletons203549	Osj050499	NF-YA	S
TFDB	Singletons203907	Osj050499	NF-YA	S
TFDB	Singletons204262	Osj050499	NF-YA	S
TFDB	Singletons204474	Osj050499	NF-YA	S
[truncated: 1,320 more rows]
